# Distinct patterns of cognitive outcome in young children with autism spectrum disorder receiving the Early Start Denver Model

## Short running title

*Distinct patterns of cognitive outcome in young*

## Authors

Godel Michel<sup>†1\*</sup> • Robain François<sup>†1</sup>, Kojovic Nada<sup>1</sup>, Franchini Martina<sup>1</sup>, Wood de Wilde Hilary<sup>1</sup>, Schaer Marie<sup>1</sup>

<sup>†</sup>Equal contribution

\*Corresponding author ([michel.godel@unige.ch](mailto:michel.godel@unige.ch), 022 322 89 36)

<sup>1</sup> Department of Psychiatry, University of Geneva School of Medicine, Geneva, Switzerland (9, Chemin des Mines, 1202, Geneva, Switzerland)

## Abstract

Evidence-based, early intervention significantly improves developmental outcome in young children with autism. Nonetheless, there is high interindividual heterogeneity in developmental trajectories during the therapy. It is established that starting intervention as early as possible results in better developmental outcomes. But except for younger age at start, there is no clear consensus about behavioral characteristics that could provide a reliable individual prediction of a child's developmental outcome after receiving an early intervention. In this study, we analyze developmental trajectories of preschoolers with autism who received 2 years of intervention using the Early Start Denver Model (ESDM) approach in Geneva, Switzerland in an individual setting (n = 55, aged  $28.7 \pm 5.1$  months with a range of 15 – 42). Our aim was to identify early predictors of response to treatment. We applied a cluster analysis to distinguish between 3 groups based on their cognitive level at intake, and rates of cognitive change over the course of treatment. The first group of children only had a mild cognitive delay at intake and nearly no cognitive delay by the end of treatment (Higher Cognitive at baseline: HC). The children in the two other groups all presented with severe cognitive delay at baseline. However, they had two very different patterns of response to treatment. The majority significantly improved developmental scores over the course of treatment (Optimal Responders: OptR) whereas a minority of children showed little to no improvement (Minimal Responders: MinR). Further analyses showed that children who ended up having an optimal two-year treatment outcome (OptR) were characterized by higher adaptive functioning at baseline combined with rapid developmental improvement during the first 6 months of intervention. Inversely, less significant progress by the sixth month of intervention was associated with a less optimal response to treatment (MinR).

## Keywords

Autism Spectrum Disorders, Early intervention, Predictors, Response to treatment, Heterogeneity, Minimal responder

1

NOTE: This preprint reports new research that has not been certified by peer review and should not be used to guide clinical practice.

## 2 Introduction

3  
4 Autism spectrum disorder (ASD) is characterized by impairments in communication and social  
5 interactions, along with restricted and repetitive behaviors (American Psychiatric Association,  
6 2013). Over the last three decades, several comprehensive, evidence-based early intervention  
7 (EI) approaches have been developed for young children with ASD, with the aim to improve  
8 their social communication, cognitive functioning, and adaptive skills (Dawson et al., 2010;  
9 Freitag et al., 2012; Koegel et al., 1999; Lovaas et al., 1974; Prizant et al., 2006; Schreibman et  
10 al., 2015). The principles of EI usually comprise a significant number of hours (usually more  
11 than 15 hours per week) as well as an early age of onset (usually younger than 4 or 5 years  
12 old) (Corsello, 2005). Systematic reviews and meta-analyses showed positive effects of EI on  
13 cognition, adaptive skills and communication at the group level (Eldevik et al., 2009; Fuller &  
14 Kaiser, 2020). Nevertheless, many EI studies have reported a relatively heterogeneous  
15 response to these interventions, where most children show significant improvements, while  
16 others make smaller gains (Howlin et al., 2009; Warren et al., 2011). Despite important efforts  
17 to better understand variables affecting treatment response, it is currently not possible to  
18 predict to what extent a child will respond to intervention based on his or her behavioral  
19 characteristics at intake (Vivanti et al., 2014). In the current therapeutic context and in the  
20 absence of additional knowledge about individual predictors of outcome, many authors  
21 suggest that intensive early intervention should be an intervention of choice for young  
22 children diagnosed with ASD (Fuentes et al., 2021; Zwaigenbaum et al., 2015) regardless of  
23 their specific behavioral or symptom profile. Yet, in the global framework of precision  
24 medicine (König et al., 2017), there is an urge to develop more individualized guidelines for  
25 intervention in ASD. Given the importance of providing effective programming for children  
26 with ASD as early as possible, and because of the costs and parental investment associated  
27 with early intervention, it is crucial that we move away from a “one size fits all” service  
28 provision model, and find ways to tailor a child’s intervention to their specific needs, choosing  
29 therapy approaches based on the child’s individual profile at diagnosis (Cidav et al., 2017;  
30 Penner et al., 2015; Peters-Scheffer et al., 2012).

31  
32 During the last decade, Early Start Denver Model (ESDM) has emerged as a promising  
33 Naturalistic Developmental Behavioral Interventions (NDBI) (Schreibman et al., 2015). NDBIs  
34 represent a category within the broader context of EIs, as discussed by Vivanti et al (Vivanti &  
35 Stahmer, 2021). Briefly, NDBIs designates approaches that integrate the methods derived  
36 from behavioral learning and developmental science. Main principles include varying the  
37 stimuli for learning, using the activities the child enjoys the most and emphasis put on  
38 developmental prerequisites. Within NDBIs, ESDM is notably illustrated by its overall  
39 effectiveness, its emphasis on natural environment teaching, comprehensive learning  
40 objectives and parental involvement. ESDM intervention has originally been implemented in  
41 an individualized setting (one therapist for one child, I-ESDM), but other applications have  
42 been developed such as G-ESDM where one therapist works with a little group of children and  
43 P-ESDM where parents/caregivers actually provide the intervention under supervision. In  
44 their 2010 landmark randomized controlled trial (RCT) (Dawson et al., 2010), Rogers and

45 Dawson reported a mean increase of 18 IQ points in a sample of 24 toddlers with ASD receiving  
46 the I-ESDM intervention over two years. Numerous studies have replicated these results (for  
47 a review see (Fuller & Kaiser, 2020)), highlighted a good reproducibility in different contexts  
48 such as the European one (Colombi et al., 2018; Department for Child and Adolescent  
49 psychiatry, Centre Hospitalier le Vinatier, Bron, France et al., 2019; Devescovi et al., 2021) and  
50 demonstrated the cost-effectiveness of ESDM intervention (Cidav et al., 2017; Penner et al.,  
51 2015). Overall, the ESDM approach has been shown to significantly increase cognitive,  
52 communication and adaptive skills at the group level (Fuller et al., 2020). However, the inter-  
53 individual variability in child response to treatment (RTT) is high, as with all types of EI  
54 (Contaldo et al., 2020). To date, research about RTT in ESDM remains sparse and most studies  
55 focusing on homogeneous and individualized therapy settings comprised limited sample size.  
56 Younger age at start has emerged as an important moderator of optimal outcome, probably  
57 due to higher brain plasticity (Lombardo et al., 2021; Webb et al., 2014). Age left aside, there  
58 are no behavioral child that are recommended by any international guidelines as a reliable  
59 individual predictor of RTT in ESDM, despite many attempts to identify some (Fuentes et al.,  
60 2021; Lord et al., 2020). E.g., Vivanti et al. (Vivanti et al., 2013) attempted to identify predictors  
61 of RTT in children receiving G-ESDM intervention. Their study showed that developmental  
62 gains after one year of treatment were best predicted by higher imitation skills, goal  
63 understanding and more advanced skills in the functional use of objects at baseline. This study  
64 offered insight into how children with certain baseline competencies might progress faster in  
65 a G-ESDM setting. However, outcomes were assessed after only one year of intervention and  
66 baseline measures used in this study were based on original tasks (i.e., specially developed for  
67 this study and not available in the common practice), making its results poorly reproducible.  
68 In addition, its group setting makes its conclusion hardly generalizable to the canonical  
69 individualized setting of ESDM. Besides, some authors identified that lower cognitive level at  
70 baseline could be related to higher RTT, although this effect could be biased by a larger  
71 potential for gain in children with very low cognitive profile (Devescovi et al., 2016; Robain et  
72 al., 2020). This brief review shows that various behavioral characteristics (e.g. global cognitive  
73 level or imitation skills) at baseline modulate the outcome of an ESDM intervention.  
74 Nevertheless, none of these parameters has reached the status of being a reliable predictor  
75 of individual response to ESDM intervention recommended by international guidelines yet  
76 (Fuentes et al., 2021). It is therefore currently not possible to know whether a child will  
77 respond or not to the ESDM intervention when advising it. Yet, the identification of  
78 characteristics that promote the response to a specific intervention could in the future be of  
79 great help to the clinical practice when referring a child to one EI or another. Similarly, new  
80 approaches or goals could also be implemented to promote the emergence of these  
81 predictors to create cascading effects on children's intervention response. Great  
82 interindividual heterogeneity in response to intervention has been identified as a major  
83 limitation to this quest (Vivanti et al., 2014). A promising way of dealing with this  
84 heterogeneity relies on moving from a whole-group approach to the identification of distinct  
85 subgroups exhibiting specific patterns of response to intervention (Ousley & Cermak, 2014).  
86

87 In the present study, we aim to identify early children's behavioral characteristics that could  
88 serve as predictors of outcome after receiving a specific and homogeneous NDBI (here, I-  
89 ESDM). To do so we explored the developmental trajectories of 55 preschoolers with ASD who  
90 completed two years of individualized and intensive (20 hours per week) ESDM intervention  
91 available in Geneva, Switzerland. We used a longitudinal single group design without a control

92 population, similar to previous studies in the field (Contaldo et al., 2020; Lombardo et al.,  
93 2021; Vivanti et al., 2013). Indeed, because of ethical as well as logistic considerations, a  
94 random referencing to either the ESDM intervention program or any other community  
95 treatment was not achievable. We first investigated if our sample's outcome data, in terms of  
96 cognition, symptom severity and adaptive functioning, reflected findings described in the  
97 ESDM literature. We then parsed the heterogeneity in our sample's outcome by using cluster  
98 analysis (CA) and cognitive scores as the main outcome measure. CA highlighted three  
99 different groups based on cognitive outcome. We further explored baseline differences as well  
100 as early rates of change between the three groups to identify potential predictors of two-year  
101 treatment outcome.

102

## 103 **Method**

104

### 105 **Participants**

106

107 Our original sample included 61 participants who completed two years of ESDM intervention  
108 in Geneva, Switzerland. Six participants were not included in the analyses because of missing  
109 data regarding their developmental assessment at baseline and one participant because of  
110 missing data at the end of the intervention. Missing evaluations were all caused by logistical  
111 issues (e.g. evaluation material not available at this time) and not because of children  
112 characteristics (e.g. invalid evaluation because of the child's behavior). Full description of the  
113 six excluded children is provided in Supplementary Table 3. There was no significant difference  
114 between the excluded participants and the final sample. Our analyses were thus based on the  
115 data collected from 55 participants (see Table 1).

116

117 There was no exclusion criteria based on co-occurring somatic, neurologic or genetic disorder,  
118 as long as they were not affecting the validity of behavioral measures (e.g., major cerebral  
119 palsy). There was no systematic genetic or neurological screening done in our protocol.  
120 Genetic, somatic and neurologic diagnosis were screened with parental questionnaires. To our  
121 knowledge, no children were affected by any neurologic condition (e.g., epilepsy) diagnosed  
122 by a neurologist following active consultation by parents. No parents reported any diagnosis  
123 of major somatic disorders that could have affected the validity of behavioral measures.  
124 Twenty-four participants' parents reported having met a clinical geneticist. Four of them  
125 reported a genetic finding that could be "causative for ASD" according to the geneticist's  
126 report.

127

128 All children were referred to the intervention program after receiving a clinical diagnosis of  
129 ASD according to Diagnostic and Statistical Manual of mental disorders, 5<sup>th</sup> edition (American  
130 Psychiatric Association, 2013) criteria and Autism Diagnosis Observation Schedule-Generic  
131 (ADOS-G) (Lord et al., 2000) or 2<sup>nd</sup> edition (ADOS-2) (Lord et al., 2012) diagnosis cut-offs. For  
132 children that were administered the ADOS-2 Toddler module (which does not provide a  
133 diagnostic cut-off) at baseline, the "mild to moderate concern for ASD" cut-off had to be  
134 overreached. All children assessed with a Toddler module at baseline met the diagnosis cut-  
135 off (using ADOS-2 module 1 or 2) on their visit one year later, even though this was not an  
136 inclusion criterion for our study.

137

138 Enrollment in the intervention program was also conditioned by an age criterion: participants  
139 had to be able to participate for two full years prior to age of school entry. In Geneva, a child  
140 has to be 4 years old by July 31<sup>st</sup> to enter school in August of the same year. In our sample,  
141 one child was too old (42 months old at baseline) to meet this criterion but was still enrolled  
142 in the program as there was an available position. This results in a sample that is fairly  
143 homogeneous in age at start ( $28.7 \pm 5.1$  months, see Main Table).

144

145 At least one parent had to be fluent in either French or English. Therapists fluent in both these  
146 languages were available to provide intervention, follow-up and parental coaching. The latest  
147 census in Geneva (Office Fédéral de la statistique / Office cantonal de la statistique, 2021)  
148 reports that 92.3% of the population use either French or English as a first language. We must  
149 add to this percentage the people fluent in French or English as a second language. Thus, the  
150 vast majority of the population in Geneva was eligible for the intervention program based on  
151 the language inclusion criterion. Besides, there has been increasing concerns about socio-  
152 economic representativeness of the samples used in EI research (Mirenda et al., 2022;  
153 Nahmias et al., 2019). To date the majority of ESDM studies are based on a white population  
154 with high parental income and a college educated background (S. J. Rogers et al., 2020).  
155 Geneva has a very culturally diverse population and the costs of the ESDM intervention  
156 program are almost completely covered) (Office Cantonal de la statistique (OCSTAT), 2017).  
157 As a result, our sample is fairly representative of Geneva's residents socio-economic  
158 characteristics thus providing results with a very high degree of cultural and socio-economic  
159 generalizability compared to most studies in the field (see Main Table).

160

161 Ultimately, enrollment also depended on place availability at time of referral. The parents of  
162 all participants gave their written informed consent to the research protocol that was  
163 approved by the institutional review board of the University of Geneva. All participants were  
164 assessed in the context of the ongoing longitudinal Geneva Autism Cohort study. Twenty-two  
165 children from this same sample were already included in a previous study measuring outcome  
166 after one year of ESDM intervention (Franchini et al., 2018). Baseline evaluations were  
167 completed at the start of the intervention and comprised behavioral measures that are  
168 detailed below. Parents also filled out questionnaires regarding medical history, as well as  
169 demographic information detailed below. Children were then assessed at 3 other time points  
170 at 6, 12 and 24 months of therapy, for a total of 4 assessments. Post-intervention data about  
171 subsequent school placement and support needs were collected. Children went onto either  
172 regular educational classrooms with varied levels of in-class paraprofessional support or  
173 special education classrooms.

174

## 175 **Intervention**

176

177 The 55 participants were enrolled in one of the 4 units of the *Centre d'Intervention Précoce en*  
178 *Autisme* (CIPA) in Geneva, Switzerland (Fondation Pôle Autisme (<http://www.pole->

179 [autisme.ch](http://autisme.ch)) & Office Médico-Pédagogique), where they received 20 hours a week of daily,  
180 individual intervention sessions using the Early Start Denver Model (ESDM). The ESDM is a  
181 comprehensive, evidence-based early intervention approach that promotes child learning  
182 through naturalistic developmental, and behavioral techniques (SJ. Rogers & Dawson, 2010;  
183 Schreibman et al., 2015). Parents of the participants were provided with 12 hours of once-a-  
184 week parent coaching sessions in the use of the ESDM model at the start of their child's  
185 program, and continued parent support sessions as needed throughout the two-year period.  
186 The children were evaluated every 3 months using the Early Start Denver Model Curriculum  
187 Checklist for Young Children with Autism (ESDM-CC) to establish targeted and measurable  
188 learning objectives. The intervention services were provided by graduate-level therapists (at  
189 least Master's degree), who were trained within the CIPA program in the use of the ESDM  
190 approach, meeting ESDM fidelity on the ESDM Fidelity Rating System (SJ. Rogers & Dawson,  
191 2010). Today, the team consists of 20 credentialed ESDM therapists, and the program is  
192 overseen by an ESDM certified trainer. Importantly, university background, ESDM training,  
193 fidelity rating assessment and supervision by certified trainer does not differ across the four  
194 units. The separation in four units is essentially administrative and therapists are all part of  
195 the same team sharing the same supervisors, applying identical practice.

196

## 197 **Measures**

198

199 The ADOS (which refers to the ADOS-G and its later version, the ADOS-2), is a standardized  
200 assessment which comprises a series of semi-structured social presses aimed to elicit and  
201 measure ASD symptoms (Lord et al., 2000, 2012). The schedule comprises 5 different modules,  
202 adapted to the person's age and level of language. The calibrated severity score (CSS) was  
203 used to compare the total severity score as well as the restricted and repetitive behaviors  
204 (RRB) and social affect (SA) symptoms severity scores (Gotham et al., 2009; Hus et al., 2014).  
205 The ADOS were administered by a trained examiner and filmed. The members of the team  
206 who rated the video recordings were not implicated in the delivery of the ESDM intervention.

207

208 The Mullen Scales of Early Learning (MSEL) is a standardized assessment for children aged  
209 from birth to 68 months (Mullen, 1995). It measures the child's development in five  
210 developmental domains: expressive language (EL), receptive language (RL), visual reception  
211 (VR), fine motor (FM), as well as gross motor skills (GM).

212

213 The Psychoeducational Profile – third edition (PEP-3) is a standardized assessment tool that  
214 evaluates cognitive, motor, and adaptive domains in children 2 to 7 years of age (Schopler et  
215 al., 2005). These domains include EL, RL, FM and cognitive verbal and preverbal (CVP). The  
216 PEP-3 as well as the MSEL were administered by psychologists following the standard  
217 instructions of both evaluations.

218

219 Developmental quotient scores (DQ) were computed for each subdomain of the MSEL by  
220 dividing the individual developmental age by the chronological age and multiplying by 100 as

221 described in 2006 by Lord and colleagues (Lord et al., 2006). The composite DQ was computed  
222 by calculating the average of all four subdomains' developmental ages, then dividing by the  
223 chronological age and multiplying by 100. Similarly, DQ scores were computed for the  
224 subdomains of the PEP-3 that assess domains equivalent to those of the MSEL, namely EL, RL,  
225 CVP and FM. The PEP-3 composite DQ was derived using the same formula as described for  
226 the MSEL, and has already been used for the PEP-3 subdomains in previous studies (Franchini  
227 et al., 2018). For our analyses of cognitive skills, we used the MSEL Early Learning Composite  
228 DQ. Since the MSEL was not administered for some participants (n = 7 at baseline, n = 7 after  
229 6 months of therapy, n = 3 after 12 months of therapy, n = 2 after 24 months of therapy) we  
230 replaced the missing DQ scores by their equivalent DQ scores derived from the PEP-3. It is  
231 important to keep in mind that DQ is normalized for the age at the time of evaluation. Hence,  
232 a DQ that remains stable over time does not reflect stagnation but rather continued  
233 developmental progress. Also, a loss of DQ over time does not necessarily imply regression (a  
234 loss of skills) but rather slower skill acquisition, leading to a widening of the gap between the  
235 child's current abilities and what would be expected in typical development.

236

237 The Vineland Adaptive Behavior Scales – 2<sup>nd</sup> edition (VABS-II) is a semi-structured interview  
238 administered by a trained clinician that assesses a person's adaptive behavior (Sparrow et al.,  
239 2005). The domains assessed comprise communication, socialization, daily living skills (DLS)  
240 and motor skills. An overall adaptive behavior composite score (ABC) of all these 4 domains is  
241 computed.

242

243 The ADOS, VABS-II, PEP-3 and MSEL were administered at baseline, after 12 months and after  
244 24 months of therapy. Assessment at six months only comprised the VABS-II and the MSEL.

245

246 We measured participant socio-economic using the total household yearly income and the  
247 highest level of education achieved by parents at baseline. The household income was divided  
248 into three subgroups that are detailed in Table 1. Parental educational level was first coded  
249 using the seven categories of the four-factor index of social status developed by Hollingshead  
250 (Hollingshead, 1975). We then divided these categories into two groups: 1) elementary school  
251 or high school completed, and 2) college and/or graduate degree completed.

252

### 253 **Rate of change**

254

255 For all behavioral measures acquired longitudinally (ADOS, VABS-II and DQ), we computed an  
256 individual rate of change using the following Symmetrized Percent Change (SPC) formula:

257

$$258 \quad SPC [\%/year] = 100 \times \frac{(B_y - B_x) / [(B_x + B_y) / 2]}{(age_y - age_x)}$$

259

260 Where  $B_x$  and  $B_y$  represent the behavioral measure acquired when the participant was aged  
261 of  $age_x$  and  $age_y$  respectively. In other words, SPC is the behavioral difference between two  
262 timepoints relatively to the mean of the scores across these two timepoints, then divided by  
263 the time interval (in years). This results in a yearly rate of change that can be expressed as a  
264 percentage when multiplied by 100. The main advantages of using symmetrized measures of  
265 change over absolute differences (such as  $B_y - B_x$ ) or non-symmetrized percentages (such as  
266  $(B_y - B_x) / B_x$ ) comprise increased statistical robustness, higher reliability in small samples,  
267 limited sensitivity to outliers and equivalent consideration of both  $B_x$  and  $B_y$  measures (Berry  
268 & Ayers, 2006). Also, SPC was chosen over absolute difference because it is scaled for the  
269 global developmental level of the child. More specifically, the clustering algorithm described  
270 below would consider an absolute difference of 10 DQ points in a child with an initial DQ of  
271 90 as equivalent to a gain of 10 points in a child with a 60 composite DQ at baseline. In children  
272 with ASD and low DQ, small absolute gains have a larger impact in their adaptive behavior  
273 compared to their peers with higher DQ (Green & Carter, 2014). Hence, measuring rates of  
274 change relatively to each participant global developmental level as SPC does appears more  
275 clinically meaningful.

276

277

## 278 **Statistical Analyses**

279

280 IBM®SPSS® Statistics v26.0.0.0 for macOS (Armonk, NY: IBM Corp.) was used for all analyses.  
281 Statistical significance threshold was set at  $\alpha = 0.05$ . Graphs were obtained with Prism®  
282 v8.3.0 (GraphPad Software, La Jolla California USA, [www.graphpad.com](http://www.graphpad.com)) and Matlab R2018b  
283 for macOS (MathWorks).

284

285 To test for an effect of time a repeated measure ANOVA was performed on the whole sample  
286 for each longitudinal behavioral measure using the scores collected at baseline, 12 months,  
287 and 24 months after the start of the intervention services. Greenhouse-Geisser correction was  
288 applied whenever the assumption of sphericity was violated according to Mauchly test.

289

290 Until now, methodological strategies to identify intervention-specific predictors of EI outcome  
291 include whole-sample correlations between baseline and outcome measures (Klintwall &  
292 Eikeseth, 2012; Vivanti et al., 2013), comparison between subgroups defined based on an  
293 arbitrary cut-off such as rapid vs slow learners (Sallows & Graupner, 2005) or best vs non-best  
294 outcome (Perry et al., 2008; Sallows & Graupner, 1999). A promising alternative relies on the  
295 identification of distinct phenotypic subgroups within ASD (Ousley & Cermak, 2014). Defining  
296 more homogeneous subgroups based on behavioral characteristics in a data-driven manner  
297 can be achieved by applying cluster analyses (CA), a strategy that has already been used in  
298 ASD preschool studies (for a review see (Ousley & Cermak, 2014). To date, CA has only been  
299 applied once on children with ASD participating in an EI program (Applied Behavioral Analysis:  
300 ABA) with a special focus on language development (Frazier et al., 2021). We here performed



301 a cluster analysis (CA) using cognition (assessed with the composite DQ measure) as our main  
302 outcome measure. There are several reasons why we chose DQ over other parameters. First,  
303 it is generally the main outcome measure reported in early intervention studies, and it displays  
304 the most variability (Dawson et al., 2010; Landa, 2018; Smith et al., 2000). Second, cognition  
305 has been shown to be the domain that improves the most after early intervention (Rodgers et  
306 al., 2021). Third, studies investigating possible ASD subtypes within ASD have shown that the  
307 most salient group differences emerge when categorized by cognitive skills (Witwer &  
308 Lecavalier, 2008). We used a *k*-means clustering approach to identify subgroups in terms of  
309 DQ trajectories with a maximal number of iterations set to 10 (Hartigan & Wong, 1979). We  
310 chose two variables that capture individual DQ trajectories: the composite DQ at baseline and  
311 the composite DQ SPC over the two-year intervention period. To objectively determine the  
312 number of clusters *k* we used a two-step clustering approach as suggested by Kodinariya  
313 (Kodinariya & Makwana, 2013). We used the two-step clustering algorithm developed by Chiu  
314 et al. (Chiu et al., 2001) as it is implemented in IBM®SPSS® Statistics. Briefly, this method firstly  
315 divides the sample into a set of sub-clusters through a sequential approach and secondly  
316 merges the sub-clusters through a hierarchical technique based on the log-likelihood distance  
317 between them. Finally, the Akaike's information criterion is used to objectively determine the  
318 optimal number of clusters.

319  
320 The cluster analysis (CA) yielded 3 optimal clusters based on the baseline composite DQ and  
321 the composite DQ SPC over 2 years (Fig 1) (with silhouette measure of cohesion and  
322 separation equal to 0.6). The ANOVA revealed that one of these clusters exhibited significantly  
323 greater composite DQ at baseline compared to the others and was therefore named "higher  
324 cognitive at baseline" (HC, *n* = 20). Its average DQ at baseline was  $78.6 \pm 10.9$  with a range  
325 between 64.4 and 107.9 with a SPC of  $9.9 \pm 5.8$  %/yr. This corresponds to an average 18.3 gain  
326 for a final DQ of  $96.9 \pm 14.3$  with a range between 64.2 and 124.3. The second "optimal  
327 responders" cluster (OptR, *n* = 24) was characterized by high rates of progress within the two-  
328 year program. DQ at baseline was  $51.5 \pm 10.7$  with a range between 21.9 and 66.8, and its  
329 average SPC was  $23.8 \pm 7.9$  %/year. This corresponds to an average 34.6 gain for a final DQ of  
330  $86.2 \pm 20.8$  with a range between 32.5 and 130.3. The third "minimal responders" cluster  
331 (MinR, *n* = 11) was characterized by decreased rates of progress compared to the two other  
332 clusters with an average SPC of  $-11.5 \pm 12.0$  %/yr. Its composite DQ at baseline was  $44.9 \pm 8.1$   
333 with a range between 31.7 and 59.1. The average loss was 9.1 for a final DQ of  $35.8 \pm 8.9$  with  
334 a range between 24.5 and 58.0. The OptR and MinR subgroups did not differ in composite DQ  
335 at baseline, with an average of 51.5 and 44.9 respectively. Together, they form a group of  
336 children with lower cognitive scores (LC) at baseline. Cluster differences over composite DQ  
337 at baseline and composite DQ SPC are illustrated on Fig 1. Detailed analyses are reported in  
338 supplementary Table 1 and 2.

339  
340 Demographic, socio-economic measures and behavioral measures at baseline were compared  
341 between clusters using one-way analysis of variance (ANOVA) or chi-square test. We used a

342 Bonferroni correction for multiple testing on the subdomains of the same clinical evaluation  
343 (e.g., the subdomains of the VABS-II), setting the statistical significance at 0.05/number of  
344 subdomains. When an ANOVA reached statistical significance, post-hoc comparisons between  
345 clusters were performed using multiple T-tests with Bonferroni correction and statistical  
346 significance set at 0.05/number of clusters.

347

348 We then applied the same strategy to compare the SPC between clusters. We performed  
349 analyses on the following SPC: from baseline to 6 months, from baseline to 12 months, from  
350 baseline to 24 months of therapy.

351

352 Finally, we focused on the two LC clusters which showed no differences in their composite DQ  
353 at baseline to explore whether any other behavioral measure could help classifying them. To  
354 do so, we used binary logistic regression models. More specifically, we selected all behavioral  
355 measures that differed between OptR and MinR on post-hoc T-tests at baseline. Then, we  
356 performed a multivariate logistic regression using the selected measures. Whenever a  
357 composite score and one or more subdomain scores of the same test were selected, we  
358 preferred the composite measure to minimize potential collinearity between variables in the  
359 model. Then, we used the same strategy for the SPC measures during the 6 first months of  
360 intervention, and ultimately with those of the 12 first months.

361

## 362 **Sample Size**

363

364 Once the three clusters solution obtained, we were able to compute the estimated power to  
365 detect differences between groups. Based on a sample of 55 children divided in three clusters  
366 and assuming an alpha of 0.05 using ANOVA, we calculated 80% power to detect group  
367 differences of at least 0.430 effect size.

368

## 369 **Results**

370

### 371 **Whole sample trajectories**

372

373 Descriptive measures collected at each visit are reported in Table 1 for the total sample. The  
374 children were aged from 15.3 to 42.0 months at the beginning of the intervention (average:  
375  $28.7 \pm 5.1$  months). The average composite DQ of the entire group at baseline was  $60.1 \pm 17.6$   
376 (range: 21.9 – 107.9). As a group, all 55 children receiving ESDM showed a significant decrease  
377 in their total level of symptom severity (ADOS CSS) (see Table 1). This improvement was driven  
378 by a decrease in the Social Affect (SA) domain. On the contrary, the RRB symptom severity  
379 increased over time. We found that these changes occurred mainly during the first year of  
380 intervention and that CSS (both RRB and SA) were stable during the second year of  
381 intervention. In parallel, participants' developmental scores improved. This improvement was  
382 significant in all subdomains (i.e., FM, VR, RL and EL). As for the measures of symptom severity,  
383 all changes in cognition were significant during the first year of therapy but not the second

384 one, except for FM rates of change during first year that did not reach significance level in  
385 post-hoc analyses. Finally, increase in DQ was accompanied by an improvement of adaptive  
386 functioning as measured by the VABS ABC. This increase was significant during the second  
387 year of intervention only. More precisely, participants made significant gains in the  
388 communication subdomain which occurred both during the first and the second year of  
389 intervention. All statistically significant results are detailed in Table 1. Concerning the type of  
390 schooling after the intervention, 35 participants (63.6%) joined a public regular education  
391 classroom with individual educational support. One participant (1.8%) joined a regular  
392 education classroom without any support. Four children (7.3%) entered a private school that  
393 provided in-class support in a regular education classroom. Finally, 15 participants (27.3%)  
394 entered special education program within the public-school system.

395

### 396 **Parsing the heterogeneity in treatment response**

397

398 Difference between the three subgroups at baseline

399

400 We found no differences between clusters for parental educational attainment or household  
401 income (see Supplementary Table 1). Inclusion procedure resulted in a sample that was  
402 homogeneous in age at baseline ( $28.7 \pm 5.1$  months). Yet we compared age at baseline  
403 between groups to exclude this variable as a confound factor and found no difference  
404 regarding age at baseline. When looking at DQ at baseline, we found that HC showed higher  
405 scores in all DQ subdomains compared to both other clusters. Considering adaptive behavior,  
406 HC exhibited higher scores in ABC as well as in the communication subdomain compared to  
407 both other clusters. HC also showed a higher score in adaptive socialization and motor skills  
408 compared to MinR. All statistically significant results of analyses on the DQ and the VABS-II  
409 across the three subgroups at baseline are illustrated on Fig 2. There was no difference in the  
410 total ADOS CSS. In the ADOS subdomains, we found that HC exhibited lower RRB compared to  
411 MinR. Besides, the only difference between MinR and OptR was in global adaptive functioning  
412 (VABS ABC), MinR showing lower scores ( $70.7 \pm 5.2$ ) at baseline compared to OptR ( $78.5 \pm$   
413  $7.5$ ).

414

415 Differences between subgroups in rates of change over 6, 12 and 24 months of intervention

416

417 We found that over the two years of therapy, OptR exhibited higher rates of change compared  
418 to the other two subgroups in cognition (composite DQ as well as VR, FM and RL subdomains).  
419 They also showed higher rates of change in adaptive behavior compared to MinR (VABS-II ABC,  
420 in socialization, communication and DLS subdomains) (see Supplementary table 2). These  
421 differences between MinR and OptR were already present within the 12 first months of  
422 therapy in the communication subdomain. Also, we found that MinR exhibited slower rates  
423 of change during the total time of intervention compared to both other subgroups in cognition  
424 (composite DQ, VR, FM and EL) as well as in adaptive behavior (VABS-II ABC, socialization,

425 communication and DLS). Differences in the rates of change of composite DQ, VR and EL  
426 between MinR and OptR were already significant during the first year of intervention.

427

428 Finally, we found that OptR already exhibited faster rates of change in composite DQ, and  
429 adaptive functioning (VABS ABC) compared to MinR (Fig 3) after only 6 months of intervention.  
430 These differences in early DQ and VABS ABC rates of change were driven by RL and adaptive  
431 communication SPC.

432

433 We did not find any difference in the rates of change of symptom severity (total ADOS, SA and  
434 RRB) between the three subgroups during the time of intervention.

435

436 Subgroup classification based on early rates of change

437

438 Minimal responders (MinR) and optimal responders (OptR) showed no difference on the  
439 composite DQ at baseline and were both considered to have lower cognitive scores at baseline  
440 (LC). They were thus selected for our classification analyses to address the potential of clinical  
441 measures at baseline as well as their early rates of progress to classify them. At baseline, these  
442 two subgroups differed in VABS ABC. Logistic regression based on this parameter allowed an  
443 overall classification precision of 70.4% (5 out of the 11 MinR and 21 out of the 23 OptR were  
444 classified correctly). The model was significant ( $\chi^2 = 10.0$ ,  $p = .002$ ) and explained 35.5% of the  
445 variance (Nagelkerke  $R^2$ ).

446

447 Within the first 6 months of therapy, MinR showed slower SPC in the VABS-II ABC and in the  
448 composite DQ. Logistic regression based on these two variables allowed a partition of MinR  
449 and OptR with a 85.2% overall correct classification rate. Nineteen out of the 21 OptR included  
450 in the model and 4 out of the 6 MinR included were classified correctly. The logistic regression  
451 model was statistically significant ( $\chi^2 = 10.2$ ,  $p = .006$ ) and explained 48.0% of the variance  
452 (Nagelkerke  $R^2$ ). The prediction equation was the following:  $O = -0.040 * DQ\ SPC - 0.112\ VABS-$   
453  $II\ ABC\ SPC - 0.92$ .

454

455 Within the first 12 months of therapy, OptR exhibited higher SPC in both the VABS-II ABC and  
456 the composite DQ. Logistic regression performed with both measures reached a 94.3 % rate  
457 of overall correct classification between OptR and MinR. Twenty-two out of the 23 OptR  
458 included in the model and 9 out of the 11 MinR included were classified correctly. The logistic  
459 regression model was statistically significant ( $\chi^2 = 22.5$ ,  $p < 0.001$ ) and explained 67.5% of the  
460 variance (Nagelkerke  $R^2$ ). The prediction equation was the following:  $O = -0.070 * DQ\ SPC -$   
461  $0.167\ VABS-II\ ABC\ SPC - 0.020$ .

462

463 Ultimately, we combined the information at baseline with the rates of change to see if the  
464 classification model was enhanced (Figure 4). Combining VABS ABC at baseline with VABS ABC  
465 and DQ SPC within the first 6 months we achieved a model with 96.3% overall precision. Five  
466 of the 6 MinR and all of the 21 OptR were classified correctly (Nagelkerke  $R^2 = 70.2\%$  ;  $\chi^2 =$

467  $16.6, p = 0.001 ; O = -0.268 * VABS-II ABC -0.049 * DQ SPC - 0.151 * VABS-II ABC SPC + 19.450$ ).  
468 Combining VABS ABC at baseline with VABS ABC and DQ SPC within 12 months the model  
469 reached 94.1% overall precision. Ten of the 11 MinR and 22 of the 23 OptR were classified  
470 correctly (Nagelkerke  $R^2 = 75.5\%$  ;  $\chi^2 = 26.4, p < 0.001 ; O = -0.188 * VABS-II ABC -0.040 * DQ$   
471  $SPC - 0.191 * VABS-II ABC SPC + 13.107$ ).

472  
473 In other words, it would have already been possible for a clinician to classify a child as being  
474 an OptR or MinR with 96.3% of accuracy after six months of intervention based on the child's  
475 adaptive functioning at baseline and its rates of change in adaptive functioning and cognition.  
476 After 12 months of intervention and based on the same parameters, the overall precision  
477 classification would have reached 100%.

## 478 479 **Discussion**

480  
481 In the present study, we analyzed data from one of the largest samples of children who  
482 underwent two years of intensive (20h per week) and individualized ESDM intervention to  
483 identify predictors of their developmental outcome. Overall, we observed that, preschoolers  
484 in our sample made significant cognitive progress and adaptive skill gains over the two years  
485 of intervention (see Fig 1A). Improvements in the current sample allowed 72.7% of the  
486 children to enter a regular education classroom post-intervention, which in Geneva requires  
487 the child to have near peer-level functioning. These results are consistent with those reported  
488 in other studies on ESDM-based intervention (Dawson et al., 2010; SJ. Rogers et al., 2012).  
489 More specifically, our sample exhibited an average change in DQ (+19.9 points) that is very  
490 close to the one described in the randomized controlled trial (RCT) study by Dawson et al.  
491 (Dawson et al., 2010), which reported 18 points of cognitive gain, an average significantly  
492 greater than that of their control group. In parallel, a naturalistic study that explored  
493 developmental trajectories in preschoolers with ASD who were not enrolled in any specific  
494 therapeutic program reported an average DQ gain of only 6.3 points between 24 and 48  
495 months of age (Clark et al., 2017). The average initial DQ in the cited study ( $63.6 \pm 11.5$ ) was  
496 similar to ours ( $60.3 \pm 18.0$ ). Considering similarities in the outcome between our results and  
497 previous ESDM studies as well as differences with naturalistic studies, one can infer that ESDM  
498 intervention in our study had a causal effect on the improvements observed at the whole  
499 group level. These results therefore highlight the possibility of implementing ESDM in Europe  
500 as effectively as in the US, despite differences in culture and health care system. They also  
501 support the cost-effectiveness of ESDM intervention, with improvements in cognition and  
502 adaptive behavior known to reduce subsequent school-based support needs, offsetting costs  
503 associated with early intensive intervention (Cidav et al., 2017; Penner et al., 2015; Peters-  
504 Scheffer et al., 2012).

505  
506 This study also aimed to determine whether preschoolers with ASD who participated in a two-  
507 year NDBI intervention program (here ESDM in an individual setting, or I-ESDM) could be  
508 separated into distinct subgroups based on their cognitive trajectories over time. To achieve

509 this, we used a *k*-means cluster analysis (CA) approach with cognitive abilities at baseline and  
510 cognitive rates of change over time as variables. CA yielded three groups: 36.4% (*n* = 20) of  
511 children with a mild cognitive delay at baseline that displayed a globally good outcome (Higher  
512 cognitive at baseline: HC), and two groups of children constituting the lower cognitive scores  
513 at baseline group (LC) that had very different outcomes. The first group of LC, which  
514 represented 43.6% (*n* = 24) of the entire sample, underwent significant cognitive and adaptive  
515 skill improvements (Optimal responders: OptR) while the second group of LC, which  
516 represented ~20.0% (*n* = 11) of our sample, showed slower overall progress, and saw a  
517 widening of the developmental gap over time in cognition and adaptive behavior compared  
518 to same aged peers (Minimal responders: MinR). The clear distinction between toddlers with  
519 mild cognitive delay (HC) and those with the more severe cognitive delay at baseline (LC)  
520 observed in our sample is also reported in previous studies that applied CA to preschoolers  
521 with ASD (Fein et al., 1999; Stevens et al., 2000; Zheng et al., 2020). These studies identified  
522 at least two subgroups categorized as “high” and “low-functioning” based on early cross-  
523 sectional cognitive measures. One of the main differences in the present study is that we  
524 included a longitudinal variable in our CA (i.e., the rate of cognitive change) and were  
525 therefore able to further define our subgroups of LC children based on individual cognitive  
526 trajectories over time that a cross-sectional CA would have failed to capture. In our second  
527 analysis, we aimed to uncover potential predictors of outcome by evaluating how we can  
528 predict a child’s cluster membership. Amongst the LC subgroups (MinR and OptR), we found  
529 one difference at baseline in general adaptive functioning at baseline (see Supplementary  
530 Table 1). More importantly, we noted a significant difference between their rates of change  
531 in cognition and adaptive skills within the first 6 months of intervention. These differences  
532 were mostly driven by the progress in receptive language and adaptive communication. Using  
533 a logistic regression model, we showed that these early rates of change combined to  
534 differences at baseline predicted at 96.3 % attrition to either the MinR or OptR subgroups.  
535 This means that higher adaptive functioning skills at baseline combined to early, rapid  
536 developmental progress by 6 months of intervention allowed an accurate classification of  
537 subsequent developmental pattern.

538  
539 Our analyses of the HC subgroup suggest that a mild cognitive delay ( $78.6 \pm 10.9$  of composite  
540 DQ) at the start of an ESDM intervention is associated with an alleviation of the delay in  
541 cognitive skills (+9.9% DQ per year) and adaptive behavior (+4.2% ABC per year) over the  
542 course of treatment. In addition, children in the HC group exhibited higher levels of adaptive  
543 skills compared to other subgroups ( $84.9 \pm 9.2$  of ABC) at baseline, especially in the VABS-II  
544 domain of communication ( $84.7 \pm 8.9$ ). All HC children except for one were able to continue  
545 into a regular education classroom following the intervention. With a DQ of 64 at both the  
546 beginning and the end of the intervention, this child was the only one in the HC group with a  
547 DQ value lower than 80 at the end of the intervention. Overall, our HC subgroup results  
548 suggest a positive outcome (in terms of cognition, adaptive functioning and schooling) in  
549 preschoolers with a mild delay in cognition and communication at baseline after receiving an

550 individualized and intensive ESDM intervention. A recent review concluded that a higher  
551 cognitive level at baseline is a good predictor of positive outcome after various types of EI  
552 (Zachor & Ben-Itzchak, 2017). Also, previous studies focusing on another type of intervention  
553 (Applied Behavioral Analysis: ABA) reported that higher abilities in adaptive behavior (Eldevik  
554 et al., 2010; Sallows & Graupner, 2005) as well as in language (Magiati et al., 2011) constitute  
555 predictors of good outcome. This might suggest that mild delays in cognition and  
556 communication could represent a common predictor of good outcome among various EI  
557 approaches. These findings will need to be further explored with future RCT that assess the  
558 specific causality of ESDM intervention within these results. A practical implication of our  
559 findings concerning the HC subgroup is that clinicians who refer a toddler with a mild  
560 developmental delay at baseline to an ESDM program can be relatively confident that there  
561 will be a good outcome in cognition and adaptive behavior by the end of the intervention.

562

563 Apart from the HC group, the rest of the sample included children presenting a severe  
564 cognitive delay at baseline (Lower Cognitive, or LC). These children presented drastically  
565 different cognitive trajectories of change over time and were attributed to two distinct  
566 subgroups: OptR and MinR. Despite their severe cognitive delay at baseline (average DQ of  
567  $51.5 \pm 10.7$ ), the 24 children that composed the OptR subgroup greatly improved their  
568 cognitive and adaptive skills over time and 79.2% of them were able to join a regular education  
569 classroom with in-class support. On the other hand, the 11 children in the MinR subgroup had  
570 a similar level of cognitive impairment at baseline (average DQ of  $44.9 \pm 8.1$ ), however their  
571 cognitive and adaptive functioning scores did not improve over time. Furthermore, the  
572 developmental gap between continued to widen, despite receiving intensive early  
573 intervention. Only 2 out of 11 (18.2%) MinR children joined a regular education classroom  
574 following the intervention. One clinical implication of our analyses of OptR and MinR at  
575 baseline is that the OptR constituted most of the LC children (68.6%) thus supporting the *a*  
576 *priori* that most toddlers who present with lower cognitive scores at intake display a positive  
577 outcome after receiving an individual intensive ESDM intervention. Nonetheless, a better  
578 understanding of the factors (behavioral, biological, and environmental) that are associated  
579 with MinR remains necessary to develop more targeted clinical recommendations. For  
580 instance, future studies including more participants with comorbid conditions such as epilepsy  
581 should investigate whether they represent moderator of outcome. Furthermore, they could  
582 determine whether the additive effect of various genetic mutations may moderate the  
583 outcome (Warrier et al., 2020). In our sample, four participants had a reported genetic finding  
584 with a potential causal effect in ASD. Two of them were in the MinR group one in OptR and  
585 one in HC. Yet, the sample is far too small to draw any conclusion on the matter and future  
586 studies should address how genetic alterations modulate the RTT. The observation of two  
587 distinct trajectories of change in children with larger cognitive impairments at baseline could  
588 shed new light on the inconsistencies that exist between various studies that measured  
589 cognitive response to EI within LC preschoolers with ASD. For instance, one previous study  
590 concluded that children with this kind of profile only improve in fine motor skills and receptive

591 language but not in adaptive behavior after receiving an early and intensive ABA intervention  
592 (Ben-Itzhak et al., 2014). Other studies focusing in ESDM reported an association between  
593 lower cognitive level at baseline and high cognitive gains (Devescovi et al., 2016; Robain et al.,  
594 2020). One can hypothesize that the inter-individual heterogeneity of outcome reported by  
595 previous studies (Ben-Itzhak et al., 2014; Devescovi et al., 2016; Robain et al., 2020), as well  
596 as the differences in their results were potentially due to the existence of two latent  
597 subgroups (MinR and OptR) that may have driven results in opposite directions. Our results  
598 thus advocate for a more systematic subgroup phenotyping, including longitudinal variables,  
599 in future studies focusing on the clinical outcome of EI to better describe the phenotypic  
600 heterogeneity within LC preschoolers with ASD.

601  
602 Finally, our results suggest that the outcome after two years of intervention for children with  
603 LC at baseline can be predicted by the end of the six first months of intervention with high  
604 accuracy. Adaptive functioning was the only clinical parameter that could help distinguish  
605 OptR from MinR at baseline, allowing an overall classification precision of 70.4%. Nonetheless,  
606 based on this single variable only 45.5% of MinR could be classified correctly resulting in a  
607 relatively poor sensitivity in MinR identification at baseline. Sensitivity to OptR was largely  
608 higher with 91.3% of them correctly classified at baseline. Thus, the clinical interest for using  
609 the VABS-II alone at baseline to discriminate between LC (OptR and MinR) appears very limited.  
610 Nonetheless, the OptR group's rates of change appear to be significantly higher than those  
611 observed in the MinR group within the first year for cognitive and adaptive skills (especially in  
612 communication). Our results are in line with those of Sallows et al. (Sallows & Graupner, 2005),  
613 who reported cognitive gain during the first year of an early and intensive ABA intervention  
614 as one of the best predictor of outcome at the end of the intervention. Furthermore, we found  
615 that based on adaptive functioning at baseline combined to the rates of change in cognition  
616 and adaptive functioning within the first six months of intervention, we could infer the  
617 outcome after two years of intervention. Together, these conclusions might shed light on the  
618 timing of RTT, and when children can be considered as "*non responders*" as raised by Vivanti  
619 et al. (Vivanti et al., 2014). Indeed, our analyses suggest that the first 6 months to a year of  
620 intervention offers critical information about how a child will respond to ESDM intervention  
621 over time, and leads us to question whether an early, clear response to intervention can  
622 predict an optimal response overall. The emphasis on this early response to intervention as a  
623 predictor of long-term outcome has several clinical implications. One of them would be the  
624 importance of implementing regular, standardized follow-ups to measure children's cognition  
625 and adaptive behavior in the first 6 and 12 months, in addition to the systematic ESDM  
626 *Curriculum Checklist* (ESDM-CC) that is currently used in the model. An alternative could lie in  
627 the development of a standardized way to use the ESDM-CC to track the rate of  
628 developmental change and ultimately the post-intervention outcome. This type of early  
629 standardized follow-up could potentially alert the clinician of difficulties a MinR child might  
630 face. This does not mean that MinR should be given less resources in terms of intervention.  
631 Our results show that despite a less optimal response compared to others, MinR show



632 improvements in their raw scores. In the perspective of personalized medicine, future studies  
633 should determine what is the best intervention for these children. It might be possible that  
634 they would benefit from earlier or longer or more intensive intervention. It could also be that  
635 another type of EI (other than ESDM) would provide them a more optimal outcome. More  
636 research is needed to understand what supports or program enhancements would allow a  
637 child with a slower response to intervention to have a more optimal outcome.

638  
639 In summary, our results show that despite the lack of individual reliable predictors of outcome  
640 for children with ASD who present severe cognitive delays at baseline, the consideration of  
641 their early dynamic behavioral parameters may help predict their overall response to  
642 intervention. Further RCTs that explore the trajectories of subgroups similar to ours are  
643 needed to determine the precise effect of the ESDM on children with MinR and OptR profiles.  
644 More specifically, we need to understand whether ESDM helps OptR improve their outcome  
645 or if it prevents MinR from falling even further behind developmentally, or both. Another  
646 hypothesis to be addressed is whether ESDM has an influence in the relative number of  
647 participants that are affected to each subgroup – i.e., whether some OptR participants would  
648 have been MinR if they had not undergone an ESDM based therapy. Future research on the  
649 specific effects of ESDM on each subgroup could result in improved therapeutic guidelines  
650 that are more tailored to each child’s individual developmental trajectory. Our study provides  
651 relevant variables that should be explored by future research at the beginning and during the  
652 very first months of an ESDM intervention.

### 653 654 **Limitations**

655  
656 Despite being one of the largest samples of preschoolers who benefited from a two-year  
657 intensive and individualized ESDM program, the sample size of the present study limits the  
658 number as well as the size of subgroups that can be detected by a cluster analysis.  
659 Nevertheless, we took care to respect the commonly accepted prerequisites of cluster  
660 analyses, including the minimum sample size in each group or the number of factors in the  
661 analyses given the overall sample size (Formann, 1984; Qiu & Joe, 2006). It is possible that  
662 studies performed on larger samples could achieve more fine-grained subgrouping on a  
663 similar population based on the same measures and could lead to bigger subgroups, in turn  
664 increasing the statistical power to detect differences at baseline between lower cognitive  
665 clusters that we could not highlight.

666  
667 Another limitation that is a direct consequence of the previous one lies in the choice of the  
668 main outcome. We chose parameters related to cognitive skills as the main clustering factors.  
669 However, it would have been possible to use other measures such as level of ASD symptoms,  
670 adaptive skills or even a combination of these two. The inclusion of more variables in the  
671 model could help in defining a larger number of clusters and therefore increase our  
672 understanding of the heterogeneity of ASD in a refined manner. However, this was not  
673 possible in the present study, because of the limited sample size. The addition of more

674 variables in the model and the multiplication of clusters would have violated the cluster  
675 analysis assumptions, making its interpretation invalid. Studies with larger samples should  
676 include more clinical parameters and could also use outcome variables suggested by parents  
677 (McConachie et al., 2018).

678  
679 Within our sample, 7 children did not have their DQ at baseline assessed with the same test  
680 as the rest of the sample. Indeed, these 7 children were tested with the PEP-3 while the others  
681 were tested using the MSEL. Although the scores obtained via these two assessments show a  
682 strong consistency within our sample (Cronbach  $\alpha = .914$ ,  $n=44$ ), it is not possible to affirm  
683 that they are equivalent due to their different design. Yet, the clustering analysis applied on  
684 the sample with the 7 children excluded yielded the same cluster solution. Nonetheless, this  
685 divergence in the test used for a minority of our children should be kept in mind when  
686 interpreting the results.

687  
688  
689 A last limitation here lies in a lack of a non-ASD lower cognitive (LC) control group making  
690 difficult to evaluate the causality of ESDM intervention in the observed outcome of this  
691 specific population. Nevertheless, Hedval et al. reported that 87.7% of the preschoolers with  
692 ASD and LC at baseline ( $<70$  of DQ) still had a DQ lower than 70 when assessed after two years  
693 without receiving any EI (Hedvall et al., 2014). Moreover, their delay in adaptive functioning  
694 worsened in all the VABS-II subdomains except for communication at the group level. In  
695 contrast, in the present study LC children with similar developmental pattern (MinR) only  
696 constituted 31.4% of our LC group, while the other LC participants (OptR) exhibited large  
697 improvements in DQ as well as in adaptive behaviors. Considering these results, one can infer  
698 a causal effect of ESDM in the progress made by children with important cognitive delay at  
699 start. The specific effects of ESDM compared to other types of EI still needs to be addressed  
700 with future RCT.

## 701 702 **Conclusion**

703  
704 In this study, we applied a cluster analysis to the largest European sample of preschoolers with  
705 ASD who participated in an ESDM program for 20 hours a week over a two-year period.  
706 Overall, we found that ASD symptom severity decreased, and cognitive delay improved over  
707 the intervention period. Furthermore, the cluster analysis suggested three main patterns of  
708 cognitive trajectories over time. First, children who displayed mild cognitive and adaptive  
709 behavioral delays at baseline tended to have a good developmental prognosis, finishing their  
710 two years of early intervention with cognitive and adaptive behavior scores within the normal  
711 range. Second, children who presented with severe cognitive delays at the start of their early  
712 intervention exhibited two dramatically different patterns of developmental trajectories.  
713 About a third of these children continued to fall behind developmentally, despite intensive  
714 therapy services. The two remaining thirds of the children, who presented with lower  
715 cognitive and adaptive behavior scores at the beginning of treatment, exhibited early and

716 important gains in cognition and adaptive behavior which continued for the duration of the 2  
717 years of intervention. We found that the two lower cognitive subgroups differed in their global  
718 adaptive functioning at baseline, although this parameter alone shows a limited sensitivity in  
719 identifying the children who will show slower gains. Nevertheless, our results suggest that it  
720 may be possible to predict, after only 6 months of early intervention, and with very high levels  
721 of accuracy, whether a child will have an overall minimal or optimal response to treatment,  
722 based on their early gains in cognition and adaptive behavior combined to their adaptive  
723 functioning at baseline. These results advocate for close monitoring using standardized  
724 cognitive and adaptive behavioral testing during the first six months of intervention, especially  
725 for children that exhibit a clinically significant cognitive delay at baseline. Having an  
726 understanding early-on of how a child is responding to early intervention could alert clinicians  
727 and parents to the need to adapt and enhance the child's treatment plan. Future studies are  
728 needed to replicate these findings, and to evaluate the kinds of treatment adaptations that  
729 would optimize child outcome for each ASD subgroup. Also, there is a need for longitudinal  
730 studies that provide a long-term follow-up in the years following the end of early intervention,  
731 to be able to assess whether the patterns of cognitive profiles and response to treatment  
732 observed remain stable over time. Overall, our results advocate for a more systematic use of  
733 subgroup phenotyping that includes longitudinal parameters when assessing the efficacy of  
734 an early intensive intervention, to better decipher the great heterogeneity of behavioral  
735 dynamics in treatment response.

736

### 737 **Supplementary Material**

738

739 Supplementary table 1

740 Supplementary table 2

741 Supplementary table 3

742

743

### 744 **Declaration**

745

### 746 **Author's contribution**

747

748 M.S. conceived and designed the study. M.F, M.G., N.K., and F.R. participated in the data  
749 acquisition. M.G. and F.R. prepared and analyzed the data under the supervision of M.S. All  
750 authors participated in interpretation of results. M.G. and F.R. wrote the manuscript with the  
751 inputs from all other authors. All authors read and approved the final manuscript.

752

### 753 **Acknowledgments**

754 The authors would like to thank all the families who kindly participated in the study, all  
755 therapists at the *Centre d'Intervention Précoce en Autisme* in Geneva, as well as Alexandra  
756 Bastos, Stéphanie Baudoux, Lylia Ben Hadid, Aurélie Bochet, Léa Chambaz, Flore Couty, Sophie  
757 Diakonoff, Lisa Esposito, Constance Ferrat, Marie-Agnès Graf, Oriane Grosvernier, Kenza  
758 Latrèche, Sara Maglio, Matthieu Mansion, Eva Micol, Irène Pittet, Sonia Richetin, Laura Sallin,

759 Stefania Solazzo, Myriam Speller, Chiara Usuelli and Ornella Vico Begara for their help with  
760 data collection.

761

#### 762 **Funding**

763

764 This research was supported by the Swiss National Foundation Synapsy Grant No. (51NF40 –  
765 185897) and the Swiss National Foundation for Scientific Research Grant (No. 323630-191227  
766 to M.G., and #163859 & #190084 to M.S.). and by the “Fondation Pôle Autisme”  
767 (<https://www.pole-autisme.ch>). The funders were not involved in this study and had no role  
768 other than to provide financial support.

769

#### 770 **Availability of data and materials**

771 The datasets generated in the current study are available from the corresponding author on  
772 reasonable request.

773

#### 774 **Ethics approval and consent to participate**

775 Informed consent was obtained from the parents of all participants included in the study.  
776 Swissethics - Commission d'éthique Suisse relative à la recherche sur l'être humain approved  
777 this study (Protocole 12-163/Psy 12-014), referred under the number PB\_2016-01880 and  
778 accepted on september the 25th, 2012.

#### 779 **Competing interests**

780 The authors have no competing interests to report.

## References

- American Psychiatric Association (Ed.). (2013). *Diagnostic and statistical manual of mental disorders: DSM-5* (5th ed). American Psychiatric Association.
- Ben-Itzhak, E., Watson, L. R., & Zachor, D. A. (2014). Cognitive Ability is Associated with Different Outcome Trajectories in Autism Spectrum Disorders. *Journal of Autism and Developmental Disorders*, 44(9), 2221–2229. <https://doi.org/10.1007/s10803-014-2091-0>
- Berry, D. A., & Ayers, G. D. (2006). Symmetrized Percent Change for Treatment Comparisons. *The American Statistician*, 60(1), 27–31. JSTOR.
- Chiu, T., Fang, D., Chen, J., Wang, Y., & Jeris, C. (2001). A robust and scalable clustering algorithm for mixed type attributes in large database environment. *KDD '01, Proceedings of the seventh ACM SIGKDD international conference on Knowledge discovery and data mining*. <https://doi.org/10.1145/502512.502549>
- Cidav, Z., Munson, J., Estes, A., Dawson, G., Rogers, S.J., & Mandell, D. (2017). Cost Offset Associated With Early Start Denver Model for Children With Autism. *Journal of the American Academy of Child and Adolescent Psychiatry*, 56(9), 777–783. <https://doi.org/10.1016/j.jaac.2017.06.007>
- Clark, M. L. E., Barbaro, J., & Dissanayake, C. (2017). Continuity and Change in Cognition and Autism Severity from Toddlerhood to School Age. *Journal of Autism and Developmental Disorders*, 47(2), 328–339. <https://doi.org/10.1007/s10803-016-2954-7>
- Colombi, C., Narzisi, A., Ruta, L., Cigala, V., Gagliano, A., Pioggia, G., Siracusano, R., Rogers, S. J., Muratori, F., & Prima Pietra Team. (2018). Implementation of the Early Start Denver Model in an Italian community. *Autism*, 22(2), 126–133. <https://doi.org/10.1177/1362361316665792>
- Contaldo, A., Colombi, C., Pierotti, C., Masoni, P., & Muratori, F. (2020). Outcomes and moderators of Early Start Denver Model intervention in young children with autism spectrum disorder delivered in a mixed individual and group setting. *Autism: The International Journal of Research and Practice*, 24(3), 718–729. <https://doi.org/10.1177/1362361319888344>
- Corsello, C. M. (2005). Early Intervention in Autism: *Infants & Young Children*, 18(2), 74–85. <https://doi.org/10.1097/00001163-200504000-00002>
- Dawson, G., Rogers, S.J., Munson, J., Smith, M., Winter, J., Greenson, J., Donaldson, A., & Varley, J. (2010). Randomized, Controlled Trial of an Intervention for Toddlers With Autism: The Early Start Denver Model. *Pediatrics*, 125(1), e17–e23. <https://doi.org/10.1542/peds.2009-0958>
- Department for Child and Adolescent psychiatry, Centre Hospitalier le Vinatier, Bron, France, Geoffray, M.-M., Laboratory Health Services and Performance Research (HESPER), Lyon, France, Denis, A., Hospices Civils de Lyon, Pôle de Santé Publique, Lyon, France, Mengarelli, F., Peter, C., Gallifet, N., Beaujeard, V., Department for Child and Adolescent psychiatry, Centre Hospitalier le Vinatier, Bron, France, Grosmaître, C. J., Malo, V., Department for Child and Adolescent psychiatry, Centre Hospitalier de Saint Jean de Dieu, Lyon, France, Grisi, S., Georgieff, N., Department for Child and Adolescent psychiatry, Centre Hospitalier le Vinatier, Bron, France, Magnificat, S., Department for Child and Adolescent psychiatry, Centre Hospitalier de Saint Jean de Dieu, Lyon, France, Touzet, S., ... Hospices Civils de Lyon, Pôle de Santé Publique, Lyon, France. (2019). USING ESDM 12 HOURS PER WEEK IN CHILDREN WITH AUTISM SPECTRUM DISORDER: FEASIBILITY AND RESULTS OF AN OBSERVATIONAL STUDY. *Psychiatria Danubina*, 3(31), 333–339. <https://doi.org/10.24869/psyd.2019.333>

- Devescovi, R., Colonna, V., Dissegna, A., Bresciani, G., Carrozzi, M., & Colombi, C. (2021). Feasibility and Outcomes of the Early Start Denver Model Delivered within the Public Health System of the Friuli Venezia Giulia Italian Region. *Brain Sciences*, *11*(9), 1191. <https://doi.org/10.3390/brainsci11091191>
- Devescovi, R., Monasta, L., Mancini, A., Bin, M., Vellante, V., Carrozzi, M., & Colombi, C. (2016). Early diagnosis and Early Start Denver Model intervention in autism spectrum disorders delivered in an Italian Public Health System service. *Neuropsychiatric Disease and Treatment*, *12*, 1379–1384. <https://doi.org/10.2147/NDT.S106850>
- Eldevik, S., Hastings, R. P., Hughes, J. C., Jahr, E., Eikeseth, S., & Cross, S. (2009). Meta-Analysis of Early Intensive Behavioral Intervention for Children With Autism. *Journal of Clinical Child & Adolescent Psychology*, *38*(3), 439–450. <https://doi.org/10.1080/15374410902851739>
- Eldevik, S., Hastings, R. P., Hughes, J. C., Jahr, E., Eikeseth, S., & Cross, S. (2010). Using participant data to extend the evidence base for intensive behavioral intervention for children with autism. *American Journal on Intellectual and Developmental Disabilities*, *115*(5), 381–405. <https://doi.org/10.1352/1944-7558-115.5.381>
- Fein, D., Stevens, M., Dunn, M., Waterhouse, L., Allen, D., Rapin, I., & Feinstein, C. (1999). Subtypes of Pervasive Developmental Disorder: Clinical Characteristics. *Child Neuropsychology - CHILD NEUROPSYCHOL*, *5*, 1–23. <https://doi.org/10.1076/chin.5.1.1.7075>
- Formann, A. K. (1984). *Die Latent-Class-Analyse: Einführung in die Theorie und Anwendung [Latent class analysis: Introduction to theory and application]*. (Weinheim).
- Franchini, M., Zöllner, D., Gentaz, E., Glaser, B., Wood de Wilde, H., Kojovic, N., Eliez, S., & Schaer, M. (2018). Early Adaptive Functioning Trajectories in Preschoolers With Autism Spectrum Disorders. *Journal of Pediatric Psychology*. <https://doi.org/10.1093/jpepsy/jsy024>
- Frazier, T. W., Klingemier, E. W., Anderson, C. J., Gengoux, G. W., Youngstrom, E. A., & Hardan, A. Y. (2021). A Longitudinal Study of Language Trajectories and Treatment Outcomes of Early Intensive Behavioral Intervention for Autism. *Journal of Autism and Developmental Disorders*, 1–17. <https://doi.org/10.1007/s10803-021-04900-5>
- Freitag, C. M., Feineis-Matthews, S., Valerian, J., Teufel, K., & Wilker, C. (2012). The Frankfurt early intervention program FFIP for preschool aged children with autism spectrum disorder: A pilot study. *Journal of Neural Transmission*, *119*(9), 1011–1021. <https://doi.org/10.1007/s00702-012-0792-0>
- Fuentes, J., Hervás, A., Howlin, P., & (ESCAP ASD Working Party). (2021). ESCAP practice guidance for autism: A summary of evidence-based recommendations for diagnosis and treatment. *European Child & Adolescent Psychiatry*, *30*(6), 961–984. <https://doi.org/10.1007/s00787-020-01587-4>
- Fuller, E. A., & Kaiser, A. P. (2020). The Effects of Early Intervention on Social Communication Outcomes for Children with Autism Spectrum Disorder: A Meta-analysis. *Journal of Autism and Developmental Disorders*, *50*(5), 1683–1700. <https://doi.org/10.1007/s10803-019-03927-z>
- Fuller, E. A., Oliver, K., Vejnaska, S. F., & Rogers, S. J. (2020). The Effects of the Early Start Denver Model for Children with Autism Spectrum Disorder: A Meta-Analysis. *Brain Sciences*, *10*(6). <https://doi.org/10.3390/brainsci10060368>
- Gotham, K., Pickles, A., & Lord, C. (2009). Standardizing ADOS scores for a measure of severity in autism spectrum disorders. *Journal of Autism and Developmental Disorders*, *39*(5), 693–705. <https://doi.org/10.1007/s10803-008-0674-3>
- Green, S. A., & Carter, A. S. (2014). Predictors and Course of Daily Living Skills Development

- in Toddlers with Autism Spectrum Disorders. *Journal of Autism and Developmental Disorders*, 44(2), 256–263. <https://doi.org/10.1007/s10803-011-1275-0>
- Hartigan, J. A., & Wong, M. A. (1979). Algorithm AS 136: A K-Means Clustering Algorithm. *Applied Statistics*, 28(1), 100. <https://doi.org/10.2307/2346830>
- Hedvall, Å., Westerlund, J., Fernell, E., Holm, A., Gillberg, C., & Billstedt, E. (2014). Autism and developmental profiles in preschoolers: Stability and change over time. *Acta Paediatrica*, 103(2), 174–181. <https://doi.org/10.1111/apa.12455>
- Hollingshead, A. A. (1975). Four-factor index of social status. *Yale University, Unpublished manuscript*.
- Howlin, P., Magiati, I., & Charman, T. (2009). Systematic Review of Early Intensive Behavioral Interventions for Children With Autism. *American Journal on Intellectual and Developmental Disabilities*, 114(1), 23–41. <https://doi.org/10.1352/2009.114:23-41>
- Hus, V., Gotham, K., & Lord, C. (2014). Standardizing ADOS domain scores: Separating severity of social affect and restricted and repetitive behaviors. *Journal of Autism and Developmental Disorders*, 44(10), 2400–2412. <https://doi.org/10.1007/s10803-012-1719-1>
- Klintwall, L., & Eikeseth, S. (2012). Number and controllability of reinforcers as predictors of individual outcome for children with autism receiving early and intensive behavioral intervention: A preliminary study. *Research in Autism Spectrum Disorders*, 6(1), 493–499. <https://doi.org/10.1016/j.rasd.2011.07.009>
- Kodinariya, T., & Makwana, P. R. (2013). Review on determining number of Cluster in K-Means Clustering. *Undefined*. /paper/Review-on-determining-number-of-Cluster-in-K-Means-Kodinariya-Makwana/1a34936bffe558a380168b790dc37956813514ba
- Koegel, L. K., Koegel, R. L., Harrower, J. K., & Carter, C. M. (1999). Pivotal Response Intervention I: Overview of Approach. *Research and Practice for Persons with Severe Disabilities*, 24(3), 174–185. <https://doi.org/10.2511/rpsd.24.3.174>
- König, I. R., Fuchs, O., Hansen, G., Mutius, E. von, & Kopp, M. V. (2017). What is precision medicine? *European Respiratory Journal*, 50(4). <https://doi.org/10.1183/13993003.00391-2017>
- Landa, R. J. (2018). Efficacy of early interventions for infants and young children with, and at risk for, autism spectrum disorders. *International Review of Psychiatry*, 30(1), 25–39. <https://doi.org/10.1080/09540261.2018.1432574>
- Lombardo, M. V., Busuoli, E. M., Schreibman, L., Stahmer, A. C., Pramparo, T., Landi, I., Mandelli, V., Bertelsen, N., Barnes, C. C., Gazestani, V., Lopez, L., Bacon, E. C., Courchesne, E., & Pierce, K. (2021). Pre-treatment clinical and gene expression patterns predict developmental change in early intervention in autism. *Molecular Psychiatry*. <https://doi.org/10.1038/s41380-021-01239-2>
- Lord, C., Brugha, T. S., Charman, T., Cusack, J., Dumas, G., Frazier, T., Jones, E. J. H., Jones, R. M., Pickles, A., State, M. W., Taylor, J. L., & Veenstra-VanderWeele, J. (2020). Autism spectrum disorder. *Nature Reviews Disease Primers*, 6(1), 5. <https://doi.org/10.1038/s41572-019-0138-4>
- Lord, C., Risi, S., DiLavore, P. S., Shulman, C., Thurm, A., & Pickles, A. (2006). Autism from 2 to 9 years of age. *Archives of General Psychiatry*, 63(6), 694–701. <https://doi.org/10.1001/archpsyc.63.6.694>
- Lord, C., Risi, S., Lambrecht, L., Cook, E. H., Leventhal, B. L., DiLavore, P. C., Pickles, A., & Rutter, M. (2000). The autism diagnostic observation schedule-generic: A standard measure of social and communication deficits associated with the spectrum of autism. *Journal of Autism and Developmental Disorders*, 30(3), 205–223.

- Lord, C., Rutter, M., DiLavore, P. C., Risi, S., Gotham, K., & Bishop, S. L. (2012). *Autism Diagnostic Observation Schedule, 2nd edition (ADOS-2)*. Western Psychological Services.
- Lovaas, O. I., Schreibman, L., & Koegel, R. L. (1974). A behavior modification approach to the treatment of autistic children. *Journal of Autism and Childhood Schizophrenia*, 4(2), 111–129. <https://doi.org/10.1007/BF02105365>
- Magiati, I., Moss, J., Charman, T., & Howlin, P. (2011). Patterns of change in children with Autism Spectrum Disorders who received community based comprehensive interventions in their pre-school years: A seven year follow-up study. *Research in Autism Spectrum Disorders*, 5(3), 1016–1027. <https://doi.org/10.1016/j.rasd.2010.11.007>
- McConachie, H., Livingstone, N., Morris, C., Beresford, B., Couteur, A. L., Gringras, P., Garland, D., Jones, G., Macdonald, G., Williams, K., & Parr, J. R. (2018). Parents Suggest Which Indicators of Progress and Outcomes Should be Measured in Young Children with Autism Spectrum Disorder. *Journal of Autism and Developmental Disorders*, 48(4), 1041–1051. <https://doi.org/10.1007/s10803-017-3282-2>
- Mirenda, P., Colozzo, P., Smith, V., Kroc, E., Kalynchuk, K., Rogers, S. J., & Ungar, W. J. (2022). A Randomized, Community-Based Feasibility Trial of Modified ESDM for Toddlers with Suspected Autism. *Journal of Autism and Developmental Disorders*. <https://doi.org/10.1007/s10803-021-05390-1>
- Mullen, E. M. (1995). *Mullen Scales of Early Learning* (AGS ed.).
- Nahmias, A. S., Pellecchia, M., Stahmer, A. C., & Mandell, D. S. (2019). Effectiveness of community-based early intervention for children with autism spectrum disorder: A meta-analysis. *Journal of Child Psychology and Psychiatry*, 60(11), 1200–1209. <https://doi.org/10.1111/jcpp.13073>
- Office Cantonal de la statistique (OCSTAT). (2017). *Mémento Statistique du Canton de Genève*. [https://statistique.ge.ch/tel/publications/2017/donnees\\_generales/memento/dg-ms-2017.pdf](https://statistique.ge.ch/tel/publications/2017/donnees_generales/memento/dg-ms-2017.pdf)
- Office Fédéral de la statistique / Office cantonal de la statistique. (2021). *Relevé structurel: Population résidante selon l'origine et la ou les langue(s) principale(s) de 2015 à 2019*. [https://www.ge.ch/statistique/tel/domaines/01/01\\_06/T\\_01\\_06\\_1\\_01.xls](https://www.ge.ch/statistique/tel/domaines/01/01_06/T_01_06_1_01.xls)
- Ousley, O., & Cermak, T. (2014). Autism Spectrum Disorder: Defining Dimensions and Subgroups. *Current Developmental Disorders Reports*, 1(1), 20–28. <https://doi.org/10.1007/s40474-013-0003-1>
- Penner, M., Rayar, M., Bashir, N., Roberts, S. W., Hancock-Howard, R. L., & Coyte, P. C. (2015). Cost-Effectiveness Analysis Comparing Pre-diagnosis Autism Spectrum Disorder (ASD)-Targeted Intervention with Ontario's Autism Intervention Program. *Journal of Autism and Developmental Disorders*, 45(9), 2833–2847. <https://doi.org/10.1007/s10803-015-2447-0>
- Perry, A., Cummings, A., Geier, J., Freeman, N., Hughes, S., LaRose, L., Managhan, T., Reitzel, J.-A., & Williams, J. (2008). Effectiveness of Intensive Behavioral Intervention in a large, community-based program. *Research in Autism Spectrum Disorders*, 2, 621–642. <https://doi.org/10.1016/j.rasd.2008.01.002>
- Peters-Scheffer, N., Didden, R., Korzilius, H., & Matson, J. (2012). Cost comparison of early intensive behavioral intervention and treatment as usual for children with autism spectrum disorder in the Netherlands. *Research in Developmental Disabilities*, 33(6), 1763–1772. <https://doi.org/10.1016/j.ridd.2012.04.006>
- Prizant, B. M., Wetherby, A. M., Rubin, E., Laurent, A. C., & Rydell, P. (2006). *The Scerts Model: A Comprehensive Educational Approach for Children With Autism Spectrum*



*Disorders*. Brookes Publishing Co.

Qiu, W., & Joe, H. (2006). Generation of Random Clusters with Specified Degree of Separation. *Journal of Classification*, 23, 315–334. <https://doi.org/10.1007/s00357-006-0018-y>

Robain, F., Franchini, M., Kojovic, N., Wood de Wilde, H., & Schaer, M. (2020). Predictors of Treatment Outcome in Preschoolers with Autism Spectrum Disorder: An Observational Study in the Greater Geneva Area, Switzerland. *Journal of Autism and Developmental Disorders*. <https://doi.org/10.1007/s10803-020-04430-6>

Rodgers, M., Simmonds, M., Marshall, D., Hodgson, R., Stewart, L. A., Rai, D., Wright, K., Bentzchak, E., Eikeseth, S., Eldevik, S., Kovshoff, H., Magiati, I., Osborne, L. A., Reed, P., Vivanti, G., Zachor, D., & Couteur, A. L. (2021). Intensive behavioural interventions based on applied behaviour analysis for young children with autism: An international collaborative individual participant data meta-analysis. *Autism*, 25(4), 1137–1153. <https://doi.org/10.1177/1362361320985680>

Rogers, S. J., Yoder, P., Estes, A., Warren, Z., McEachin, J., Munson, J., Rocha, M., Greenon, J., Wallace, L., Gardner, E., Dawson, G., Sugar, C. A., Helleman, G., & Whelan, F. (2020). A Multisite Randomized Controlled Trial Comparing the Effects of Intervention Intensity and Intervention Style on Outcomes for Young Children With Autism. *Journal of the American Academy of Child & Adolescent Psychiatry*, S0890856720313502. <https://doi.org/10.1016/j.jaac.2020.06.013>

Rogers, S.J., & Dawson, G. (2010). *Early Start Denver Model for young children with autism: Promoting language, learning, and engagement*. Guilford Press.

Rogers, S.J., Estes, A., Lord, C., Vismara, L., Winter, J., Fitzpatrick, A., Guo, M., & Dawson, G. (2012). Effects of a Brief Early Start Denver Model (ESDM)–Based Parent Intervention on Toddlers at Risk for Autism Spectrum Disorders: A Randomized Controlled Trial. *Journal of the American Academy of Child & Adolescent Psychiatry*, 51(10), 1052–1065. <https://doi.org/10.1016/j.jaac.2012.08.003>

Sallows, G. O., & Graupner, T. D. (1999). *Replicating Lovaas' Treatment and Findings: Preliminary Results 1*.

Sallows, G. O., & Graupner, T. D. (2005). Intensive Behavioral Treatment for Children With Autism: Four-Year Outcome and Predictors. *American Journal on Mental Retardation*, 110(6), 417–438. [https://doi.org/10.1352/0895-8017\(2005\)110\[417:IBTCW\]2.0.CO;2](https://doi.org/10.1352/0895-8017(2005)110[417:IBTCW]2.0.CO;2)

Schopler, E., Lansing, M. D., Reichler, R. J., & Marcus, L. M. (2005). *Psychoeducational Profile: TEACCH individualized assessment for children with autism spectrum disorders (3rd ed.)*. Pro-Ed, Inc.

Schreibman, L., Dawson, G., Stahmer, A.C., Landa, R., Rogers, S.J., McGee, G.G., Kasari, C., Ingersoll, B., Kaiser, A.P., Bruinsma, Y., McNerney, E., Wetherby, A., & Halladay, A. (2015). Naturalistic Developmental Behavioral Interventions: Empirically Validated Treatments for Autism Spectrum Disorder. *Journal of Autism and Developmental Disorders*, 45(8), 2411–2428. <https://doi.org/10.1007/s10803-015-2407-8>

Smith, T., Groen, A. D., & Wynn, J. W. (2000). Randomized trial of intensive early intervention for children with pervasive developmental disorder. *American Journal of Mental Retardation: AJMR*, 105(4), 269–285. [https://doi.org/10.1352/0895-8017\(2000\)105<0269:RTOIEI>2.0.CO;2](https://doi.org/10.1352/0895-8017(2000)105<0269:RTOIEI>2.0.CO;2)

Sparrow, S. S., Balla, D. A., & Cicchetti, D. V. (2005). *Vineland II: Vineland adaptive behavior scales*. (American Guidance Service).

Stevens, M. C., Fein, D. A., Dunn, M., Allen, D., Waterhouse, L. H., Feinstein, C., & Rapin, I.

- (2000). Subgroups of children with autism by cluster analysis: A longitudinal examination. *Journal of the American Academy of Child and Adolescent Psychiatry*, 39(3), 346–352. <https://doi.org/10.1097/00004583-200003000-00017>
- Vivanti, G., Dissanayake, C., Zierhut, C., Rogers, S.J., & Team, V. A. (2013). Brief Report: Predictors of Outcomes in the Early Start Denver Model Delivered in a Group Setting. *Journal of Autism and Developmental Disorders*, 43(7), 1717–1724. <https://doi.org/10.1007/s10803-012-1705-7>
- Vivanti, G., Prior, M., Williams, K., & Dissanayake, C. (2014). Predictors of Outcomes in Autism Early Intervention: Why Don't We Know More? *Frontiers in Pediatrics*, 2. <https://doi.org/10.3389/fped.2014.00058>
- Vivanti, G., & Stahmer, A. C. (2021). Can the Early Start Denver Model Be Considered ABA Practice? *Behavior Analysis in Practice*, 14(1), 230–239. <https://doi.org/10.1007/s40617-020-00474-3>
- Warren, Z., McPheeters, M. L., Sathe, N., Foss-Feig, J. H., Glasser, A., & Veenstra-VanderWeele, J. (2011). A Systematic Review of Early Intensive Intervention for Autism Spectrum Disorders. *Pediatrics*, 127(5), e1303–e1311. <https://doi.org/10.1542/peds.2011-0426>
- Warrier, V., Zhang, X., Reed, P., Havdahl, A., Moore, T. M., Cliquet, F., Leblond, C. S., Rolland, T., Rosengren, A., EU-AIMS-LEAP, iPSYCH-Autism Working Group, Spectrum 10K and APEX Consortium, Rowitch, D. H., Hurles, M. E., Geschwind, D. H., Børglum, A. D., Robinson, E. B., Grove, J., Martin, H. C., ... Baron-Cohen, S. (2020). *Genetic correlates of phenotypic heterogeneity in autism* [Preprint]. Genetic and Genomic Medicine. <https://doi.org/10.1101/2020.07.21.20159228>
- Webb, S. J., Jones, E. J. H., Kelly, J., & Dawson, G. (2014). The motivation for very early intervention for infants at high risk for autism spectrum disorders. *International Journal of Speech-Language Pathology*, 16(1), 36–42. <https://doi.org/10.3109/17549507.2013.861018>
- Witwer, A. N., & Lecavalier, L. (2008). Examining the validity of autism spectrum disorder subtypes. *Journal of Autism and Developmental Disorders*, 38(9), 1611–1624. <https://doi.org/10.1007/s10803-008-0541-2>
- Zachor, D. A., & Ben-Itzhak, E. (2017). Variables Affecting Outcome of Early Intervention in Autism Spectrum Disorder. *Journal of Pediatric Neurology*, 15(03), 129–133. <https://doi.org/10.1055/s-0037-1601444>
- Zheng, S., Hume, K. A., Able, H., Bishop, S. L., & Boyd, B. A. (2020). Exploring Developmental and Behavioral Heterogeneity among Preschoolers with ASD: A Cluster Analysis on Principal Components. *Autism Research*, 13(5), 796–809. <https://doi.org/10.1002/aur.2263>
- Zwaigenbaum, L., Bauman, M. L., Choueiri, R., Kasari, C., Carter, A., Granpeesheh, D., Mailloux, Z., Roley, S. S., Wagner, S., Fein, D., Pierce, K., Buie, T., Davis, P. A., Newschaffer, C., Robins, D., Wetherby, A., Stone, W. L., Yirmiya, N., Estes, A., ... Natowicz, M. R. (2015). Early Intervention for Children With Autism Spectrum Disorder Under 3 Years of Age: Recommendations for Practice and Research. *Pediatrics*, 136(Supplement 1), S60–S81. <https://doi.org/10.1542/peds.2014-3667E>

| MEASURE                                                  | At Baseline        | + 6 months         | + 12 months        | +24 months         | Pval (R.M. ANOVA)       | Partial Eta Squared | 0 - 24mo            | 0 - 12mo            | 12mo - 24mo    |
|----------------------------------------------------------|--------------------|--------------------|--------------------|--------------------|-------------------------|---------------------|---------------------|---------------------|----------------|
| <b>Clinical Description</b>                              |                    |                    |                    |                    |                         |                     |                     |                     |                |
| ADOS CSS total [Mean (SD)]                               | <b>8.0 (1.9)</b>   |                    | <b>6.6 (2.0)</b>   | <b>6.6 (2.7)</b>   | <b>&lt;.001***</b>      | .169                | <b>0.002**</b>      | <b>&lt;0.001***</b> | 1.000          |
| ADOS CSS SA                                              | <b>7.6 (2.0)</b>   |                    | <b>5.3 (1.7)</b>   | <b>5.5 (2.5)</b>   | <b>&lt;.001*** (G)</b>  | .304                | <b>&lt;0.001***</b> | <b>&lt;0.001***</b> | 1.000          |
| ADOS CSS RRB                                             | <b>8.0 (2.0)</b>   |                    | <b>9.1 (1.3)</b>   | <b>8.4 (2.7)</b>   | <b>&lt;.007** (G)</b>   | .094                | <b>0.975</b>        | <b>&lt;0.001***</b> | 0.122          |
| ADI-R subdomains [Mean (SD)] (n = 51)                    |                    |                    |                    |                    |                         |                     |                     |                     |                |
| ADI-R Social interactions                                | 14.2 (5.2)         |                    |                    |                    |                         |                     |                     |                     |                |
| ADI-R RRB                                                | 4.0 (2.2)          |                    |                    |                    |                         |                     |                     |                     |                |
| VABS-II Adaptative Behavior Composite [Mean (SD)] (n=48) | 79.9 (9.4)         | <i>81.3 (12.0)</i> | 80.7 (12.3)        | 83.3 (16.1)        | <b>0.046* (G)</b>       | <b>0.073</b>        | <b>0.152</b>        | <b>1.000</b>        | <b>0.044*</b>  |
| VABS-II socialization                                    | 80.6 (9.9)         | <i>81.0 (9.9)</i>  | 80.7 (10.2)        | 80.4 (12.6)        | 0.967 (G)               |                     |                     |                     |                |
| VABS-II communication                                    | <b>75.6 (12.3)</b> | <i>80.5 (14.8)</i> | <b>84.0 (17.7)</b> | <b>87.6 (19.0)</b> | <b>&lt;0.001*** (G)</b> | .377                | <b>&lt;0.001***</b> | <b>&lt;0.001***</b> | <b>0.008**</b> |
| VABS-II daily living skills                              | 83.57 (12.4)       | <i>85.0 (11.6)</i> | 84.8 (11.8)        | 84.5 (16.8)        | 0.726 (G)               |                     |                     |                     |                |
| VABS-II motor skills                                     | 89.5 (11.6)        | <i>89.4 (11.0)</i> | 89.9 (10.6)        | 90.1 (15.2)        | <b>0.920 (G)</b>        |                     |                     |                     |                |
| Composite DQ [Mean (SD)]                                 | <b>60.1 (17.6)</b> | <i>71.7 (20.9)</i> | <b>77.0 (25.0)</b> | <b>80.0 (28.1)</b> | <b>&lt;0.001***</b>     | .325                | <b>&lt;0.001***</b> | <b>&lt;0.001***</b> | 1.000          |
| Fine Motricity DQ                                        | <b>74.3 (17.0)</b> | <i>76.1 (16.0)</i> | <b>76.1 (18.4)</b> | <b>81.7 (25.5)</b> | <b>0.035 (G)*</b>       | .063                | <b>0.088</b>        | <b>1.000</b>        | <b>0.132</b>   |
| Visual Reception DQ                                      | <b>74.6 (22.9)</b> | <i>85.3 (23.5)</i> | <b>88.6 (30.8)</b> | <b>88.6 (30.7)</b> | <b>&lt;0.001*** (G)</b> | .150                | <b>0.003</b>        | <b>&lt;0.001***</b> | 1.000          |
| Expressive Language DQ                                   | <b>44.0 (19.2)</b> | <i>56.8 (25.3)</i> | <b>66.4 (29.3)</b> | <b>68.7 (28.0)</b> | <b>&lt;0.001*** (G)</b> | .447                | <b>&lt;0.001***</b> | <b>&lt;0.001***</b> | 0.782          |
| Receptive Language DQ                                    | <b>47.4 (26.2)</b> | <i>68.8 (29.0)</i> | <b>76.8 (30.1)</b> | <b>79.0 (33.6)</b> | <b>&lt;0.001*** (G)</b> | .432                | <b>&lt;0.001***</b> | <b>&lt;0.001***</b> | 1.000          |
| <b>Demographics</b>                                      |                    |                    |                    |                    |                         |                     |                     |                     |                |
| Chronological age [months Mean (SD)]                     | 28.7 (5.1)         |                    |                    |                    |                         |                     |                     |                     |                |
| Gender [females Number ( percentage)]                    | 7 (12.7 %)         |                    |                    |                    |                         |                     |                     |                     |                |
| Parental Education [Number (percentage)] (n=46)          |                    |                    |                    |                    |                         |                     |                     |                     |                |
| Elementary School or High School                         | 21 (38.2%)         |                    |                    |                    |                         |                     |                     |                     |                |
| University or PhD                                        | 33 (60.0 %)        |                    |                    |                    |                         |                     |                     |                     |                |
| Household Income [Number (percentage)] (n=45)            |                    |                    |                    |                    |                         |                     |                     |                     |                |
| <60k                                                     | 14 (25.5%)         |                    |                    |                    |                         |                     |                     |                     |                |
| 60-140k                                                  | 18 (32.7%)         |                    |                    |                    |                         |                     |                     |                     |                |
| >140k                                                    | 21 (38.2 %)        |                    |                    |                    |                         |                     |                     |                     |                |

**Table 1: Sample characteristics over the two years of ESDM intervention**

Scores at 6 months (in *italic*) are indicative and were not used in the repeated measure (R.M.) ANOVA. Scores with a significant difference are highlighted in bold; \* $p < .05$  \*\*  $p < .01$  \*\*\* $p < .001$ . G: *Greenhouse-Geisser correction applied*, ESDM = *Early Start Denver Model*

**Figure 1: A.** Composite DQ trajectory of the total sample over the two years of intervention. Significant results of repeated measure ANOVA are displayed. **B.** Composite DQ trajectories of the three subgroups parsed by the cluster analysis. **C.** Individual values of the two measures used in the clustering analysis algorithm (composite DQ at baseline and DQ SPC over the two years of interventions). Color code represents the cluster membership of each participant after the application of the cluster analysis. **D.** Differences between the three subgroups on the two measures that were used to parse them. \*\*\* $p < .001$ . DQ: Developmental Quotient. HC: Higher Cognitive. MinR: Minimal Responders. OptR: Optimal Responders. SPC: Symmetrized Percent Change.

**Figure 2: A.** Statistically significant differences in DQ subdomains between subgroups at baseline. **B.** Statistically significant differences in VABS-II ABC and VABS-II subdomains between subgroups at baseline. \* $p < .05$ . \*\* $p < .01$ . \*\*\* $p < .001$ . ABC: Adaptive Behavior Composite. DQ: Developmental Quotient. EL: Expressive Language. FM: Fine Motor. HC: Higher Cognitive. MinR: Minimal Responders. OptR: Optimal Responders. RL: Receptive Language. VABS-II: Vineland Adaptive Behavior Scale. VR: Visual Reception.

**Figure 3: A.** Statistically significant differences between subgroups in the rates of change of behavioral measures (DQ and VABS-II) within the first 6 months of intervention. **B.** Statistically significant differences between subgroups in the rates of change of behavioral measures (DQ and VABS-II) within the first 12 months of intervention. \* $p < .05$ . \*\* $p < .01$ . \*\*\* $p < .001$ . ABC: Adaptive Behavior Composite. DLS: Daily Living Skills. DQ: Developmental Quotient. EL: Expressive Language. FM: Fine Motor. HC: Higher Cognitive. MinR: Minimal Responders. OptR: Optimal Responders. RL: Receptive Language. SPC: Symmetrized Percent Change. VABS-II: Vineland Adaptive Behavior Scale. VR: Visual Reception.

**Figure 4: A.** Multinomial logistic regression between MinR and OptR using their rates of change within the 6 first months of intervention in Composite DQ and VABS-II ABC, as well as their VABS-II ABC at baseline. Color code corresponds to subgroup membership (red: MinR, green: OptR). Decision boundary is represented in a dotted line. **B.** Multinomial logistic regression between MinR and OptR using their rates of change within the 12 first months of intervention in Composite DQ and VABS-II ABC, as well as their VABS-II ABC at baseline. ABC: Adaptive Behavior Composite. DQ: Developmental Quotient. SPC: Symmetrized Percent Change. VABS-II: Vineland Adaptive Behavior Scale.

**A**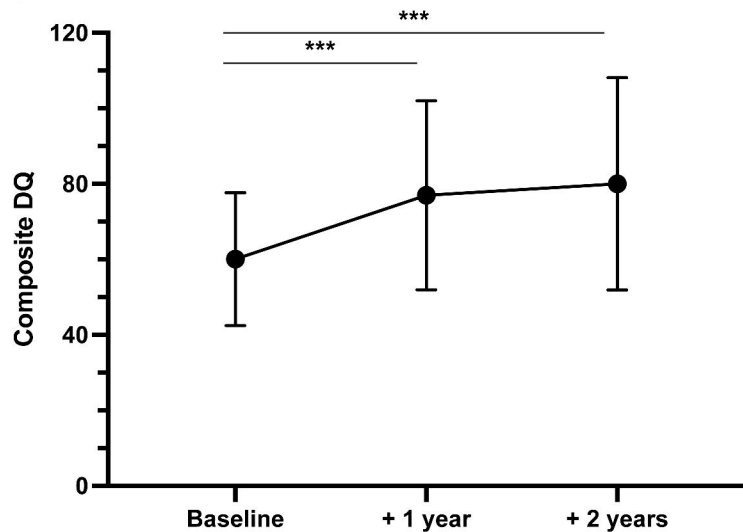**B**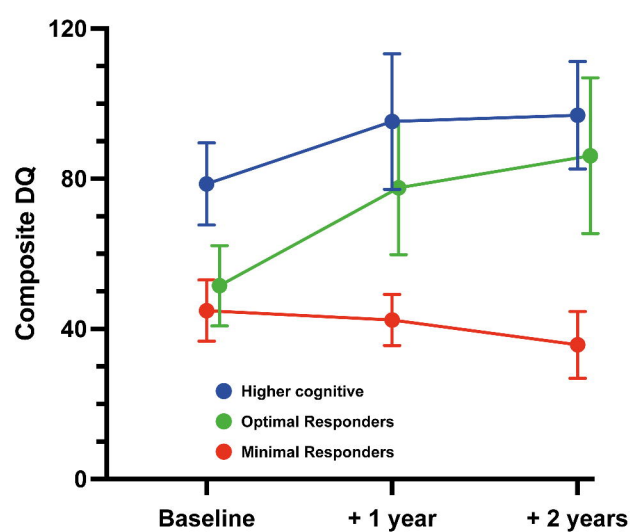**C**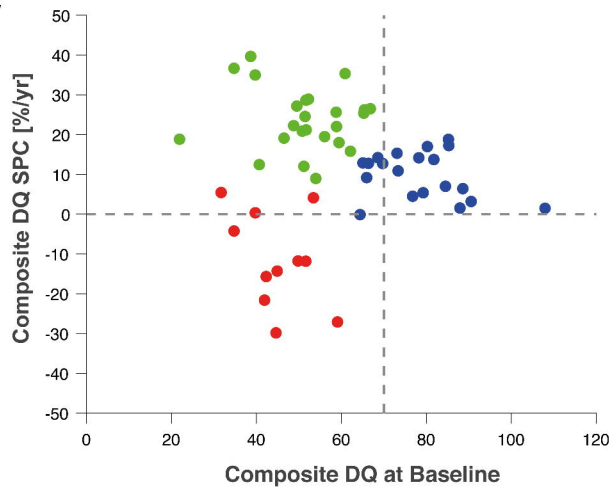**D**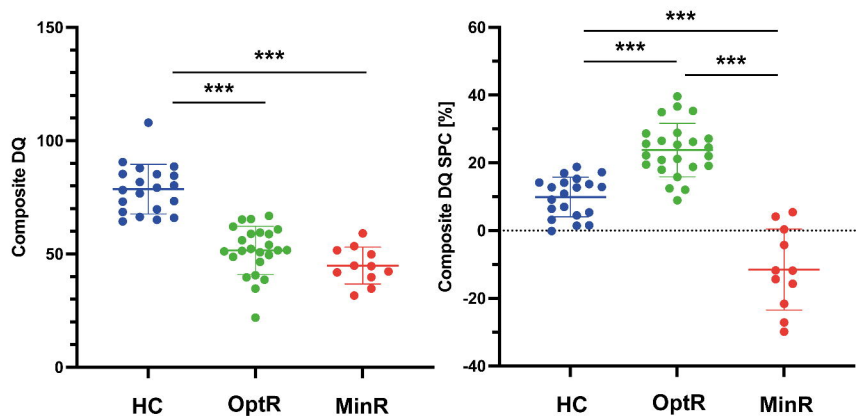

**A**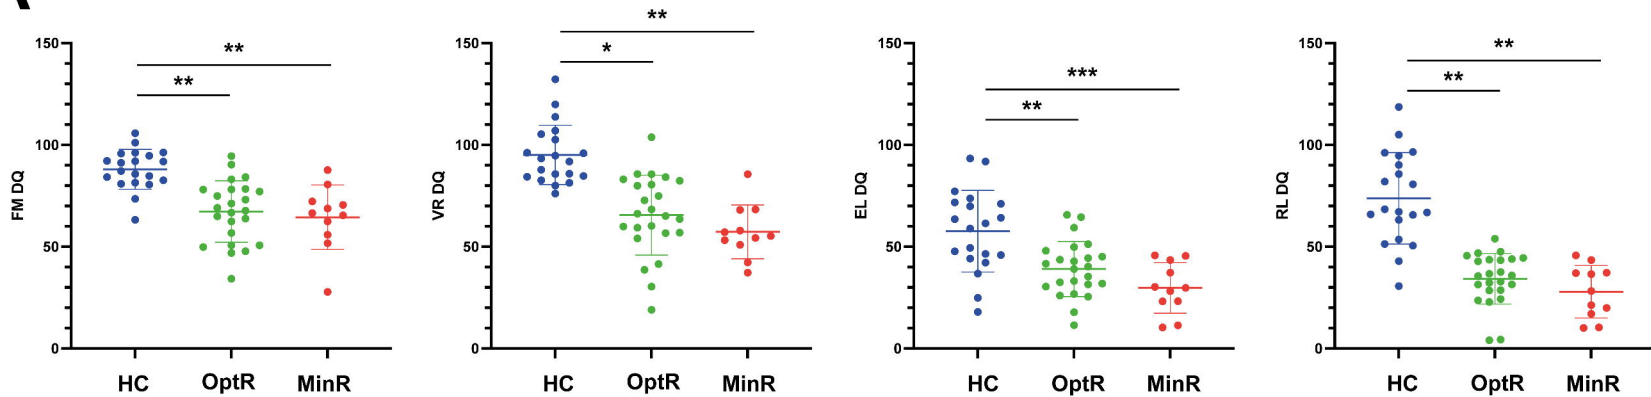**B**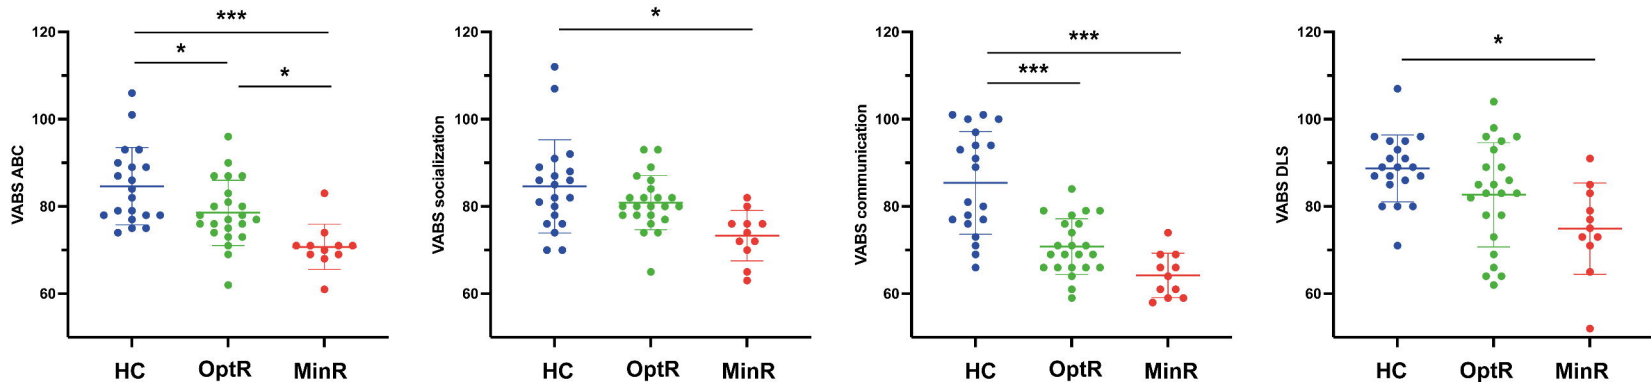

**A**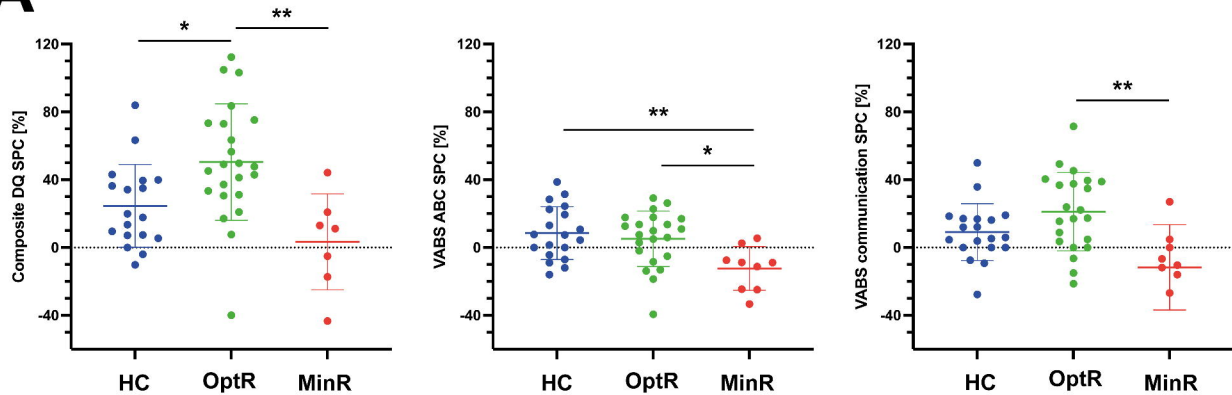**B**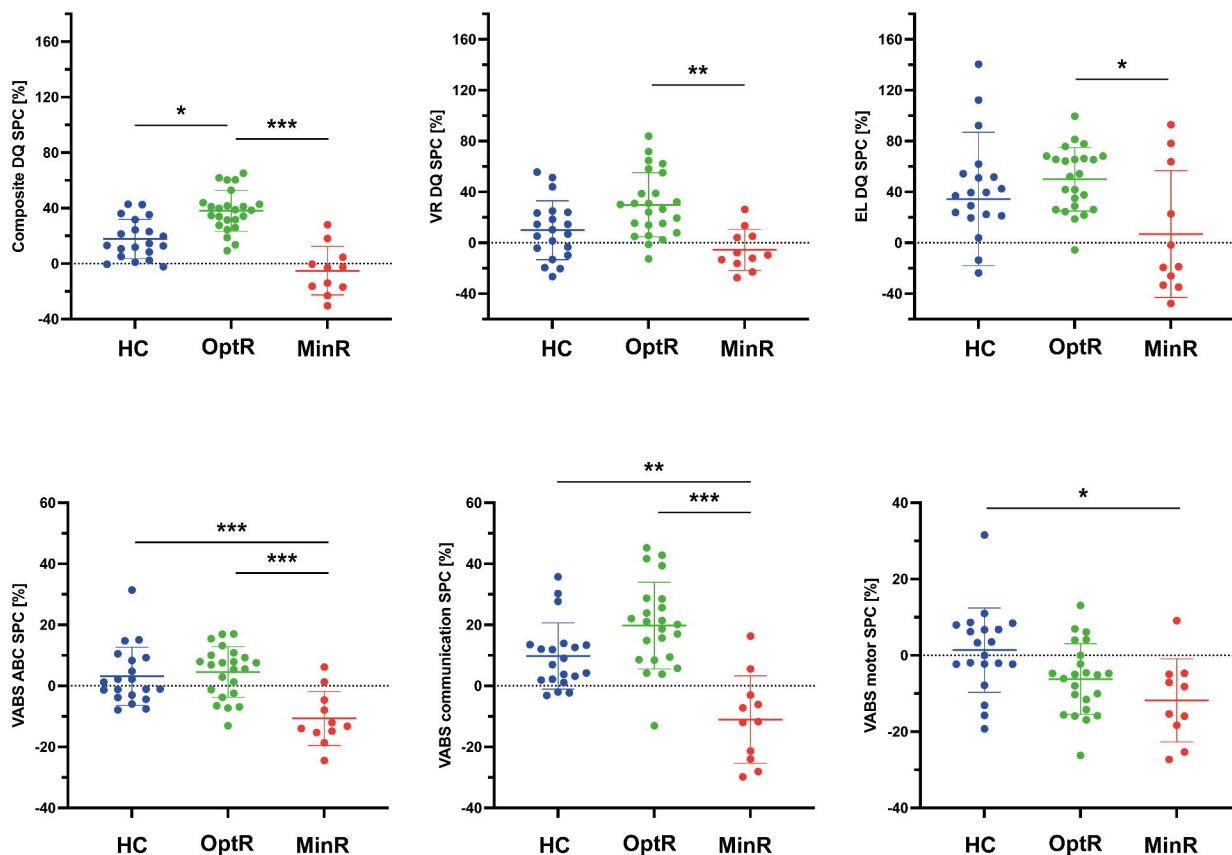

Source: https://medrxiv.org/content/10.1101/2021.04.05.21254908v4.full.pdf
